# Supplementary material for: Visible light-promoted intermolecular cyclization/aromatization of chalcones and 2-mercaptobenzimidazolesviaan EDA complex and a mechanism study
Source: Royal Society of Chemistry journal article supplement (doi:10.1039/d2ob00847e), 2022-01-01
Supplement: d2ob00847e1.pdf [file d2ob00847e1.pdf]

## Supporting Information

# Visible Light-Promoted Intermolecular Cyclization/Aromatization of Chalcones and 2- Mercaptobenzimidazoles via EDA Complex and Mechanism Study

Xue-Jun Zhao,<sup>a</sup> Yuke Li,<sup>\*b</sup> Ming Li,<sup>a</sup> Ya-Ling Tian,<sup>a</sup> Wen-Peng Wang,<sup>a</sup> Bo-Sheng Zhang<sup>\*a</sup> and Xi-Cun Wang<sup>\*a</sup>

<sup>a</sup> Gansu International Scientific and Technological Cooperation Base of Water-Retention Chemical Functional Materials, College of Chemistry and Chemical Engineering, Northwest Normal University, Lanzhou, Gansu, 730070, China.

E-mail: [zhangbsh@nwnu.edu.cn](mailto:zhangbsh@nwnu.edu.cn), [wangxicun@nwnu.edu.cn](mailto:wangxicun@nwnu.edu.cn).

<sup>b</sup> Department of Chemistry and Centre for Scientific Modeling and Computation, Chinese University of Hong Kong, Shatin, Hong Kong, China.

E-mail: [yukeli@link.cuhk.edu.hk](mailto:yukeli@link.cuhk.edu.hk).

## Table of Contents

|                                                              |    |
|--------------------------------------------------------------|----|
| 1. General information.....                                  | 1  |
| 2. Experimental sections.....                                | 2  |
| 3. Computational details .....                               | 7  |
| 4. Analytical data for all compounds <sup>[7, 8]</sup> ..... | 13 |
| 5. NMR Spectra.....                                          | 21 |
| References:.....                                             | 50 |

## 1. General information

$^1\text{H}$  NMR or  $^{19}\text{F}$  NMR and  $^{13}\text{C}$  NMR data analyses were performed with Varian Mercuryplus-400 instrument and plus-600 instrument respectively. NMR employed  $\text{CDCl}_3$  as solvent and tetramethylsilane (TMS) as internal standard. Chemical shifts were reported in units (ppm) by specifying TMS resonance in the  $^1\text{H}$  NMR spectrum as 0.00 ppm. The data of  $^1\text{H}$  NMR was reported as follows: chemical shift, multiplicity (s = singlet, d = doublet, t = triplet, m = multiplet and br = broad), coupling constant (J values) in Hz and integration. Chemical shift for  $^{13}\text{C}$  NMR spectra were recorded in ppm from TMS using the central peak of  $\text{CDCl}_3$  (77.0ppm) as the internal standard. Flash chromatography was performed using 200-300 mesh silica gel with the indicated solvent system according to standard techniques. Analytical thin-layer chromatography (TLC) was performed on pre-coated, glass-backed silica gel plates. Melting points were measured with an XT-4 apparatus. High-resolution mass spectra (HRMS) (ESI) were obtained with a Bruker Daltonics APEX II 47e and Orbitrap Elite mass spectrometer. Column chromatography was generally performed on silica gel (200–300 mesh) and TLC analyses were conducted on silica gel GF254 plates. All the chemical reagents were purchased from commercial sources and used as received unless otherwise indicated. Chalcones were prepared according to the existing literature, and other reagents were purchased from domestic analytical reagents.

## 2. Experimental sections

### 2.1 Experimental setup

The reaction device includes ordinary magnetic stirring and LUYOR-3416 LED parallel light reactor of Shanghai Luyang Instrument company. The reaction was carried out in an open 10 mL borosilicate glass tube (Figure S1). During the reaction, the room temperature was 25-30°C for all the reactions.

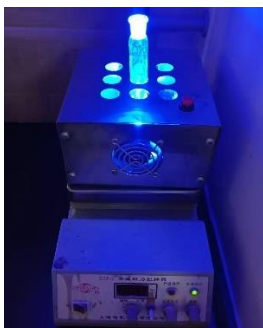

Figure S1. Reaction setup for this reaction.

### 2.2 Optimization of reaction conditions

Table S1. Optimization of reaction conditions <sup>a</sup>

| Entry     | Solvent            | Base                                | 2a       | Yield (%) <sup>b</sup> |
|-----------|--------------------|-------------------------------------|----------|------------------------|
| 1         | EtOH               | Cs <sub>2</sub> CO <sub>3</sub>     | 4        | NR                     |
| 2         | CH <sub>3</sub> CN | Cs <sub>2</sub> CO <sub>3</sub>     | 4        | Trace                  |
| 3         | PhCH <sub>3</sub>  | Cs <sub>2</sub> CO <sub>3</sub>     | 4        | NR                     |
| 4         | THF                | Cs <sub>2</sub> CO <sub>3</sub>     | 4        | NR                     |
| 5         | NMP                | Cs <sub>2</sub> CO <sub>3</sub>     | 4        | NR                     |
| 6         | Dioxane            | Cs <sub>2</sub> CO <sub>3</sub>     | 4        | NR                     |
| 7         | DMSO               | NaCO <sub>3</sub>                   | 4        | 25                     |
| 8         | DMSO               | K <sub>3</sub> PO <sub>4</sub>      | 4        | Trace                  |
| 9         | DMSO               | CH <sub>3</sub> COONa               | 4        | Trace                  |
| 10        | DMSO               | Cs <sub>2</sub> CO <sub>3</sub>     | 2        | --                     |
| 11        | DMSO               | Cs <sub>2</sub> CO <sub>3</sub>     | 3        | --                     |
| 12        | DMSO               | Cs <sub>2</sub> CO <sub>3</sub>     | 3.5      | 33                     |
| <b>13</b> | <b>DMSO</b>        | <b>Cs<sub>2</sub>CO<sub>3</sub></b> | <b>4</b> | <b>65</b>              |

<sup>a</sup> Reaction conditions: 1a (0.1 mmol), 34W blue LED, solvent (2 mL), base (2 equiv.), 13h, rt, air.

<sup>b</sup> Isolated yield.

### 2.3 General Procedure for synthesis of products

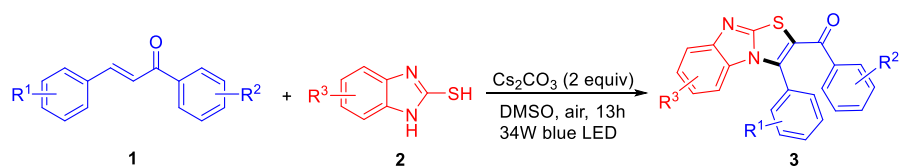

An oven-dried 10 mL borosilicate glass tube was charged with the mixture of chalcone **1** (0.1 mmol), 2-mercaptobenzimidazole **2** (4 equiv.), Cs<sub>2</sub>CO<sub>3</sub> (2 equiv., 65.2 mg). Then the reaction mixture was stirred in 2 mL DMSO with a 34W blue LED light irradiation for 13 h in air. After the completion of the reaction detected by TLC. The reaction was quenched with saturated brine (10 mL) and extracted with ethyl acetate (3×10 mL). The organic layers were combined and dried over anhydrous MgSO<sub>4</sub>, and concentrated under reduced pressure to obtain crude product. The crude product was isolated by silica gel column chromatography with petroleum ether/ethyl acetate (5:1), to obtain the purified product **3**.

## 2.4 Substrate limitations

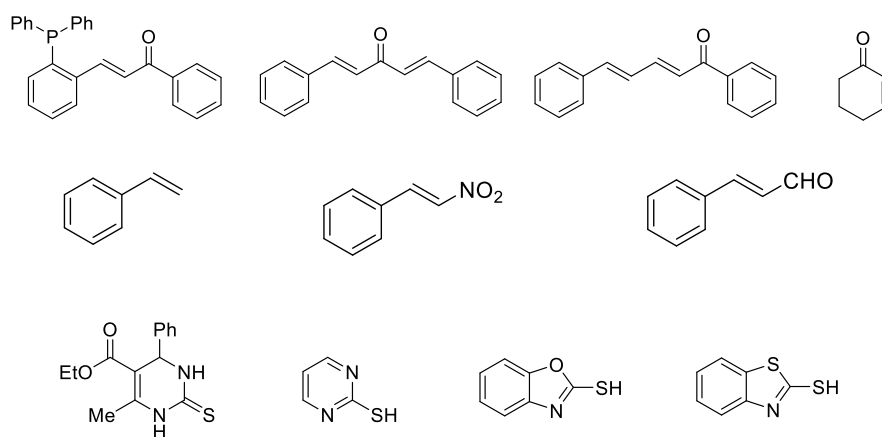

## 2.5 Free radical capture

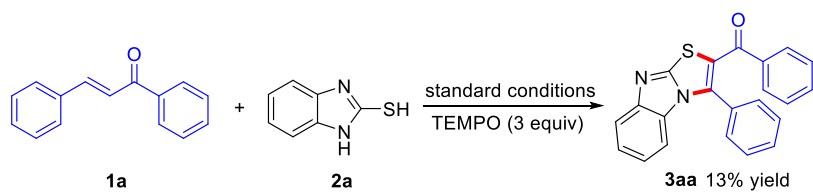

An oven-dried 10 mL borosilicate glass was charged with the mixture of chalcone **1a** (0.1 mmol, 20.8 mg), 2-mercaptobenzimidazole **2a** (4 equiv., 60.1 mg),  $\text{Cs}_2\text{CO}_3$  (2 equiv., 65.2 mg) and TEMPO (3.0 equiv., 46.9 mg). Then the reaction mixture was stirred in 2 mL DMSO with a 34W blue LED light irradiation for 13 h in air. After the reaction finished, the reaction mixture was detected by HRMS, and the TEMPO-trapped product was found (Figure S2).

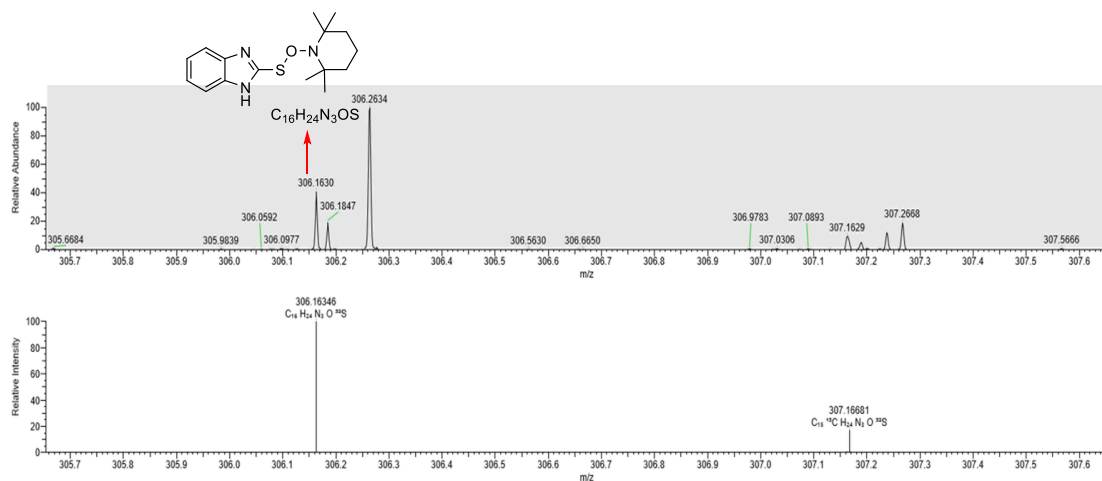

Figure S2. HRMS spectrum of the TEMPO trapping experiment

## 2.6 UV-vis spectroscopic measurements

The UV-vis absorption spectra of chalcone **1a** (0.005 M), 2-mercaptobenzoimidazole **2a** (0.02 M) and  $\text{Cs}_2\text{CO}_3$  (0.01 M) in DMSO were recorded in 1 cm path quartz cuvettes respectively (Figure S3). As shown in Figure S3, when **1a**, **2a**, and  $\text{Cs}_2\text{CO}_3$  were mixed in DMSO, the obvious color changes of the solution and an red-shift in the visible region was observed, demonstrating the formation of EDA complex.

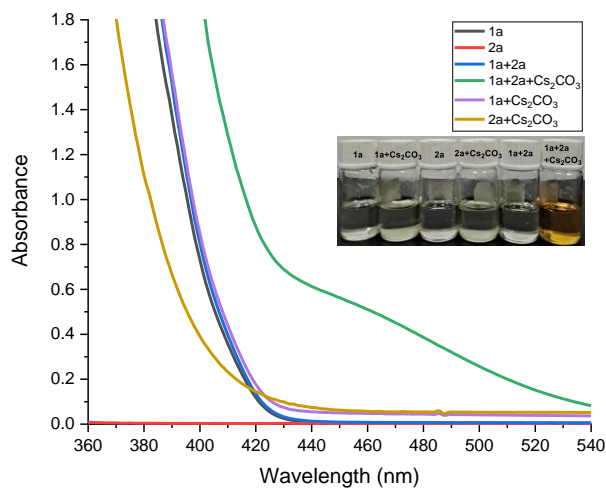

**Figure S3. UV-vis spectroscopic measurements on various combinations of **1a**, **2a**, and  $\text{Cs}_2\text{CO}_3$  in DMSO.**



### 3. Computational details

All the calculations were performed using the Gaussian 09 programs<sup>1</sup>. All of the structures were fully optimized with the B3LYP<sup>2-3</sup> method and Ahlrichs' split-valence def2-SVP basis set<sup>4</sup> in DiMethyl Sulfoxide employing the Polarizable Continuum Model (PCM)<sup>5</sup>. Grimmes's DFT-D3 dispersion correction was used to describe the van der waals interaction.<sup>6</sup> Vibrational frequency calculations were performed to ensure that a transition state has only one imaginary frequency and a local minimum has no imaginary frequency. Transition states connecting relevant minima were further examined by running intrinsic reaction coordinate (IRC) calculations.

#### Cartesian Coordinates

##### 1a

|   |          |          |          |
|---|----------|----------|----------|
| C | -1.29893 | 0.05147  | -0.22515 |
| C | -2.75091 | -0.05485 | -0.39647 |
| C | -3.67439 | 0.89900  | -0.13864 |
| C | -5.12368 | 0.79600  | -0.41422 |
| C | -5.79777 | -0.54234 | -0.53499 |
| O | -5.77951 | 1.82364  | -0.56346 |
| C | -5.44022 | -1.65102 | 0.25273  |
| C | -6.14477 | -2.85354 | 0.13983  |
| C | -7.20484 | -2.96397 | -0.76584 |
| C | -7.57354 | -1.86132 | -1.54783 |
| C | -6.88325 | -0.65582 | -1.42255 |
| C | -0.66469 | 1.20554  | 0.28448  |
| C | 0.72039  | 1.24887  | 0.43167  |
| C | 1.50542  | 0.14335  | 0.07425  |
| C | 0.89306  | -1.00764 | -0.43180 |
| C | -0.49488 | -1.05191 | -0.57947 |
| H | -3.09413 | -1.01360 | -0.79685 |
| H | -3.37745 | 1.89574  | 0.20059  |
| H | -4.62704 | -1.56815 | 0.97588  |
| H | -5.86650 | -3.70548 | 0.76497  |
| H | -7.74911 | -3.90720 | -0.85870 |
| H | -8.40470 | -1.94342 | -2.25263 |
| H | -7.17092 | 0.21628  | -2.01335 |
| H | -1.25926 | 2.07590  | 0.56911  |
| H | 1.19472  | 2.15006  | 0.82790  |
| H | 2.59126  | 0.18185  | 0.19126  |
| H | 1.49785  | -1.87347 | -0.71212 |
| H | -0.96984 | -1.95415 | -0.97440 |

##### 2a

|   |          |          |          |
|---|----------|----------|----------|
| C | 2.09208  | 0.71498  | -0.00218 |
| C | 2.07859  | -0.69653 | -0.00158 |
| C | 0.88053  | -1.41295 | -0.00081 |
| C | -0.32241 | -0.68926 | -0.00064 |
| C | -0.28850 | 0.73120  | -0.00125 |
| C | 0.90669  | 1.45528  | -0.00202 |
| N | -1.63614 | -1.13434 | 0.00009  |
| C | -2.36338 | -0.04169 | -0.00012 |
| N | -1.61838 | 1.11326  | -0.00087 |
| S | -4.12589 | 0.03444  | 0.00057  |
| H | 3.05006  | 1.24084  | -0.00277 |
| H | 3.02850  | -1.23724 | -0.00172 |
| H | 0.86757  | -2.50511 | -0.00034 |
| H | 0.91410  | 2.54718  | -0.00247 |
| H | -1.97328 | 2.06320  | -0.00108 |
| H | -4.26893 | -1.30935 | 0.00131  |

**A1**

|   |          |          |          |
|---|----------|----------|----------|
| C | 3.73730  | 0.89567  | 0.63922  |
| C | 3.93238  | -0.42242 | 0.17112  |
| C | 2.86801  | -1.19232 | -0.29868 |
| C | 1.58642  | -0.62056 | -0.29010 |
| C | 1.40645  | 0.70141  | 0.19777  |
| C | 2.46839  | 1.48040  | 0.66453  |
| N | 0.37478  | -1.13322 | -0.72913 |
| C | -0.49360 | -0.16756 | -0.53320 |
| N | 0.05607  | 0.95125  | 0.04384  |
| S | -2.21101 | -0.20494 | -0.93793 |
| H | 4.59793  | 1.47129  | 0.98852  |
| H | 4.94164  | -0.84083 | 0.16498  |
| H | 3.01946  | -2.20408 | -0.68037 |
| H | 2.31597  | 2.50165  | 1.01874  |
| H | -0.40375 | 1.84745  | 0.15541  |
| H | -2.06007 | -1.12339 | -1.91929 |
| C | 4.34702  | -0.44544 | -4.18336 |
| C | 2.95555  | 0.01163  | -4.12515 |
| C | 2.40360  | 0.79891  | -3.17555 |
| C | 1.01636  | 1.30756  | -3.17546 |
| C | -0.08800 | 0.56769  | -3.87593 |
| O | 0.76354  | 2.35220  | -2.57916 |
| C | -0.11689 | -0.83374 | -3.98318 |
| C | -1.22222 | -1.47441 | -4.55128 |
| C | -2.30278 | -0.72349 | -5.02766 |

|   |          |          |          |
|---|----------|----------|----------|
| C | -2.28284 | 0.67293  | -4.92144 |
| C | -1.18865 | 1.31087  | -4.33768 |
| C | 5.29165  | -0.15758 | -3.17394 |
| C | 6.59982  | -0.62821 | -3.27013 |
| C | 6.99789  | -1.39489 | -4.37458 |
| C | 6.07446  | -1.68871 | -5.38310 |
| C | 4.76260  | -1.21925 | -5.28667 |
| H | 2.32631  | -0.32153 | -4.95619 |
| H | 3.00421  | 1.20443  | -2.35700 |
| H | 0.69610  | -1.42830 | -3.56781 |
| H | -1.24302 | -2.56516 | -4.61322 |
| H | -3.16438 | -1.22671 | -5.47358 |
| H | -3.12794 | 1.26204  | -5.28597 |
| H | -1.17107 | 2.39645  | -4.22325 |
| H | 4.99658  | 0.42722  | -2.30169 |
| H | 7.31633  | -0.39856 | -2.47749 |
| H | 8.02479  | -1.76196 | -4.44574 |
| H | 6.37621  | -2.28635 | -6.24677 |
| H | 4.04309  | -1.45404 | -6.07586 |

**A2**

|   |          |          |          |
|---|----------|----------|----------|
| C | 1.31654  | 2.05860  | 0.52406  |
| C | 2.40110  | 1.17168  | 0.70090  |
| C | 2.23924  | -0.21066 | 0.58836  |
| C | 0.95739  | -0.69943 | 0.29254  |
| C | -0.11644 | 0.20856  | 0.09631  |
| C | 0.03642  | 1.59188  | 0.21556  |
| N | 0.52130  | -2.00157 | 0.09280  |
| C | -0.74617 | -1.88846 | -0.22774 |
| N | -1.19633 | -0.59064 | -0.23496 |
| S | -1.83645 | -3.21439 | -0.62882 |
| H | 1.48389  | 3.13430  | 0.62058  |
| H | 3.39021  | 1.57978  | 0.92425  |
| H | 3.08396  | -0.89532 | 0.68395  |
| H | -0.79911 | 2.27575  | 0.05484  |
| H | -2.11769 | -0.27324 | -0.51354 |
| H | -0.86760 | -4.15131 | -0.53199 |
| C | 0.62992  | -0.98893 | -3.20226 |
| C | 1.70295  | -1.92777 | -2.86939 |
| C | 2.92703  | -1.62023 | -2.38557 |
| C | 3.88561  | -2.60119 | -1.84076 |
| C | 3.90696  | -4.01971 | -2.33483 |
| O | 4.65409  | -2.25634 | -0.94412 |

|   |          |          |          |
|---|----------|----------|----------|
| C | 3.61385  | -4.36711 | -3.66548 |
| C | 3.70078  | -5.69879 | -4.08254 |
| C | 4.07200  | -6.69593 | -3.17451 |
| C | 4.37367  | -6.35711 | -1.84865 |
| C | 4.30345  | -5.02669 | -1.43609 |
| C | 0.75907  | 0.40796  | -3.05469 |
| C | -0.31009 | 1.25457  | -3.33944 |
| C | -1.53408 | 0.72732  | -3.77205 |
| C | -1.67823 | -0.65596 | -3.92636 |
| C | -0.60556 | -1.50361 | -3.64673 |
| H | 1.43618  | -2.98321 | -2.97552 |
| H | 3.20931  | -0.58384 | -2.18607 |
| H | 3.34018  | -3.59191 | -4.38320 |
| H | 3.48130  | -5.95734 | -5.12132 |
| H | 4.13197  | -7.73751 | -3.50026 |
| H | 4.66730  | -7.13414 | -1.13849 |
| H | 4.55013  | -4.74486 | -0.41043 |
| H | 1.69382  | 0.83460  | -2.68753 |
| H | -0.19565 | 2.33270  | -3.20516 |
| H | -2.37340 | 1.39417  | -3.98481 |
| H | -2.63119 | -1.07545 | -4.25781 |
| H | -0.72733 | -2.58444 | -3.74932 |

**EDA complex A**

|   |          |          |          |
|---|----------|----------|----------|
| C | 1.35705  | 1.43063  | 0.83348  |
| C | 2.15008  | 0.27103  | 0.95162  |
| C | 1.61690  | -1.00327 | 0.72884  |
| C | 0.26131  | -1.10673 | 0.38125  |
| C | -0.51910 | 0.07623  | 0.24993  |
| C | 0.00464  | 1.34992  | 0.47841  |
| N | -0.50584 | -2.21431 | 0.08088  |
| C | -1.72097 | -1.75784 | -0.24084 |
| N | -1.76032 | -0.37539 | -0.14185 |
| S | -3.11213 | -2.67157 | -0.71283 |
| H | 1.80644  | 2.41069  | 1.01418  |
| H | 3.20673  | 0.37101  | 1.21456  |
| H | 2.24533  | -1.89417 | 0.78863  |
| H | -0.60915 | 2.24627  | 0.36482  |
| H | -2.56281 | 0.18836  | -0.39189 |
| H | -2.11923 | -3.84959 | -2.35378 |
| C | 0.03834  | -0.98690 | -3.12775 |
| C | 0.96576  | -2.07917 | -2.82112 |
| C | 2.23976  | -1.94066 | -2.38495 |

|    |          |          |          |
|----|----------|----------|----------|
| C  | 3.13560  | -3.01880 | -1.93247 |
| C  | 2.94583  | -4.44463 | -2.37617 |
| O  | 4.04901  | -2.75150 | -1.15153 |
| C  | 2.42284  | -4.80165 | -3.63174 |
| C  | 2.30726  | -6.14749 | -3.99290 |
| C  | 2.70397  | -7.15179 | -3.10418 |
| C  | 3.24269  | -6.80723 | -1.85705 |
| C  | 3.37536  | -5.46362 | -1.50341 |
| C  | 0.32213  | 0.36433  | -2.83788 |
| C  | -0.59861 | 1.36503  | -3.14107 |
| C  | -1.82468 | 1.04094  | -3.73743 |
| C  | -2.12200 | -0.29457 | -4.02958 |
| C  | -1.20132 | -1.29812 | -3.72461 |
| H  | 0.53924  | -3.07883 | -2.93712 |
| H  | 2.65795  | -0.94849 | -2.19764 |
| H  | 2.12757  | -4.02692 | -4.34044 |
| H  | 1.90354  | -6.41176 | -4.97306 |
| H  | 2.60225  | -8.20306 | -3.38498 |
| H  | 3.56266  | -7.58814 | -1.16263 |
| H  | 3.80654  | -5.17969 | -0.54109 |
| H  | 1.25380  | 0.63197  | -2.33770 |
| H  | -0.36814 | 2.40398  | -2.89288 |
| H  | -2.54746 | 1.82812  | -3.96719 |
| H  | -3.07984 | -0.55709 | -4.48560 |
| H  | -1.43917 | -2.34194 | -3.93489 |
| C  | -2.09657 | -5.69401 | -3.00252 |
| O  | -1.46637 | -4.48009 | -2.75269 |
| O  | -3.33510 | -5.67649 | -3.17163 |
| O  | -1.32569 | -6.68382 | -3.00666 |
| Cs | -3.60233 | -8.67965 | -3.65566 |
| Cs | -0.14428 | -5.36901 | -0.09293 |

## References

1. Frisch, M. J.; Trucks, G. W.; Schlegel, H. B.; Scuseria, G. E.; Robb, M. A.; Cheeseman, J. R.; Scalmani, G.; Barone, V.; Mennucci, B.; Petersson, G. A.; Nakatsuji, H.; Caricato, M.; Li, X.; Hratchian, H. P.; Izmaylov, A. F.; Bloino, J.; Zheng, G.; Sonnenberg, J. L.; Hada, M.; Ehara, M.; Toyota, K.; Fukuda, R.; Hasegawa, J.; Ishida, M.; Nakajima, T.; Honda, Y.; Kitao, O.; Nakai, H.; Vreven, T.; Montgomery, J. A.; Peralta, J. E.; Ogliaro, F.; Bearpark, M.; Heyd, J. J.; Brothers, E.; Kudin, K. N.; Staroverov, V. N.; Kobayashi, R.; Normand, J.; Raghavachari, K.; Rendell, A.; Burant, J. C.; Iyengar, S. S.; Tomasi, J.; Cossi, M.; Rega, N.; Millam, J. M.; Klene, M.; Knox, J. E.; Cross, J. B.; Bakken, V.; Adamo, C.; Jaramillo, J.; Gomperts, R.; Stratmann, R. E.; Yazyev, O.; Austin, A. J.; Cammi, R.; Pomelli, C.; Ochterski, J. W.; Martin, R. L.; Morokuma, K.; Zakrzewski,

- V. G.; Voth, G. A.; Salvador, P.; Dannenberg, J. J.; Dapprich, S.; Daniels, A. D.; Farkas; Foresman, J. B.; Ortiz, J. V.; Cioslowski, J.; Fox, D. J., Gaussian 09 Revision D.01. 2009.
2. Lee, C.; Yang, W.; Parr, R. G., Development of the Colle-Salvetti correlation-energy formula into a functional of the electron density. *Physical Review B* **1988**, *37* (2), 785-789.
  3. Becke, A. D., A new mixing of Hartree–Fock and local density-functional theories. *J. Chem. Phys.* **1993**, *98* (2), 1372-1377.
  4. Weigend, F.; Ahlrichs, R., Balanced basis sets of split valence, triple zeta valence and quadruple zeta valence quality for H to Rn: Design and assessment of accuracy. *Phys. Chem. Chem. Phys.* **2005**, *7* (18), 3297-3305.
  5. Tomasi, J.; Mennucci, B.; Cammi, R., Quantum mechanical continuum solvation models. *Chem Rev* **2005**, *105* (8), 2999-3093.
  6. Grimme, S.; Antony, J.; Ehrlich, S.; Krieg, H., A consistent and accurate ab initio parametrization of density functional dispersion correction (DFT-D) for the 94 elements H-Pu. *J. Chem. Phys.* **2010**, *132* (15), 154104.

#### 4. Analytical data for all compounds<sup>1</sup>

##### Phenyl(3-phenylbenzo[4,5]imidazo[2,1-b]thiazol-2-yl)methanone (3aa)

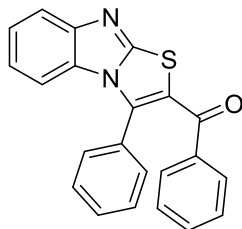

Light yellow crystal, (23.2 mg, 65%), m.p. = 208-210 °C. <sup>1</sup>H NMR (400 MHz, CDCl<sub>3</sub>): δ 7.79 (d, *J* = 8.4 Hz, 1H), 7.49 (d, *J* = 7.6 Hz, 2H), 7.41 (d, *J* = 7.2 Hz, 3H), 7.38 – 7.29 (m, 4H), 7.15 (t, *J* = 7.6 Hz, 2H), 7.01 (t, *J* = 7.8 Hz, 1H), 6.84 (d, *J* = 8.0 Hz, 1H). <sup>13</sup>C NMR (150 MHz, CDCl<sub>3</sub>): δ 188.9, 155.3, 149.0, 138.7, 137.0, 132.0, 130.6, 130.1, 130.1, 128.6, 128.6, 127.8, 127.7, 124.6, 121.1, 119.4, 112.0. HRMS (ESI) *m/z*: Calcd for C<sub>22</sub>H<sub>15</sub>N<sub>2</sub>OS [M+H]<sup>+</sup> 355.0900, Found 355.0898.

##### (3-(4-fluorophenyl)benzo[4,5]imidazo[2,1-b]thiazol-2-yl)(phenyl)methanone (3ab)<sup>1</sup>

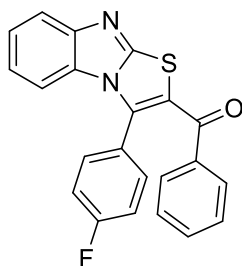

Light yellow crystal, (22.0 mg, 59%), m.p. = 186-188 °C. <sup>1</sup>H NMR (400 MHz, CDCl<sub>3</sub>): δ 7.78 (d, *J* = 8.0 Hz, 1H), 7.49 (dd, *J* = 8.4, 1.2 Hz, 2H), 7.46 – 7.32 (m, 4H), 7.20 (d, *J* = 7.8 Hz, 2H), 7.11 – 7.01 (m, 3H), 6.85 (d, *J* = 8.4 Hz, 1H). <sup>13</sup>C NMR (150 MHz, CDCl<sub>3</sub>): δ 188.7, 163.8 (d, *J* = 250.5 Hz), 155.1, 149.0, 137.5, 137.0, 132.3, 130.0, 128.6, 128.0, 124.7 (d, *J* = 7.5 Hz), 123.8, (d, *J* = 4.5 Hz), 121.2, 119.5, 116.0 (d, *J* = 22.5 Hz), 111.8. <sup>19</sup>F NMR (376 MHz, CDCl<sub>3</sub>): δ -108.38 – -108.46 (m).

##### (3-(4-chlorophenyl)benzo[4,5]imidazo[2,1-b]thiazol-2-yl)(phenyl)methanone (3ac)<sup>1</sup>

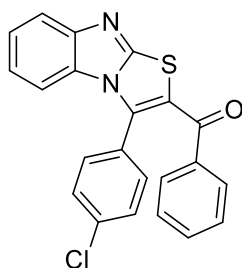

Light yellow crystal, (25.2 mg, 65%), m.p. = 191-193 °C. <sup>1</sup>H NMR (400 MHz, CDCl<sub>3</sub>): δ 7.79 (d, *J* = 8.0 Hz, 1H), 7.50 (dd, *J* = 8.4, 1.2 Hz, 2H), 7.43 – 7.32 (m, 6H), 7.22 (t, *J* = 7.8 Hz, 2H), 7.05 (t, *J* = 7.8 Hz, 1H), 6.87 (d, *J* = 8.4 Hz, 1H). <sup>13</sup>C NMR (150 MHz, CDCl<sub>3</sub>): δ 188.5, 155.1, 148.9, 137.3, 137.0, 132.2, 131.4, 129.9, 129.0, 128.7, 128.0, 126.2, 124.7, 124.6, 121.3, 119.5, 111.9.

##### (3-(4-bromophenyl)benzo[4,5]imidazo[2,1-b]thiazol-2-yl)(phenyl)methanone (3ad)<sup>1</sup>

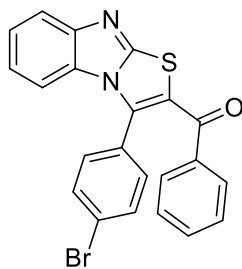

Light yellow crystal, (27.5 mg, 64%), m.p. = 205-206 °C.  $^1\text{H NMR}$  (400 MHz,  $\text{CDCl}_3$ ):  $\delta$  7.78 (d,  $J = 8.0$  Hz, 1H), 7.50 (d,  $J = 8.4$  Hz, 4H), 7.46 – 7.28 (m, 4H), 7.22 (d,  $J = 7.8$  Hz, 2H), 7.05 (t,  $J = 7.8$  Hz, 1H), 6.87 (d,  $J = 8.0$  Hz, 1H).  $^{13}\text{C NMR}$  (150 MHz,  $\text{CDCl}_3$ ):  $\delta$  188.5, 155.1, 148.9, 137.3, 137.0, 132.2, 131.9, 131.6, 129.9, 128.7, 128.0, 126.6, 125.3, 124.7, 124.6, 121.3, 119.5, 111.9.

**Phenyl(3-(p-tolyl)benzo[4,5]imidazo[2,1-b]thiazol-2-yl)methanone (3ae)<sup>1</sup>**

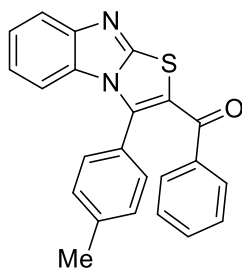

White crystal, (18.6 mg, 51%), m.p. = 176-177 °C.  $^1\text{H NMR}$  (400 MHz,  $\text{CDCl}_3$ ):  $\delta$  7.78 (d,  $J = 8.0$  Hz, 1H), 7.57 – 7.45 (m, 2H), 7.39 – 7.26 (m, 4H), 7.24 – 7.09 (m, 4H), 7.02 (t,  $J = 7.8$  Hz, 1H), 6.91 (d,  $J = 8.0$  Hz, 1H), 2.37 (s, 3H).  $^{13}\text{C NMR}$  (150 MHz,  $\text{CDCl}_3$ ):  $\delta$  189.06, 155.4, 149.0, 141.0, 139.1, 137.1, 131.8, 130.1, 130.0, 129.3, 128.7, 127.8, 124.7, 124.5, 124.2, 121.1, 119.3, 112.2, 21.4.

**(3-(4-methoxyphenyl)benzo[4,5]imidazo[2,1-b]thiazol-2-yl)(phenyl)methanone (3af)<sup>1</sup>**

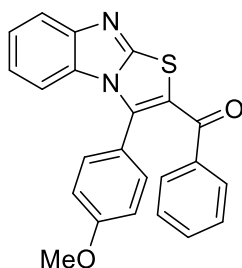

Light yellow crystal, (18.5 mg, 48%), m.p. = 192-194 °C.  $^1\text{H NMR}$  (400 MHz,  $\text{CDCl}_3$ ):  $\delta$  7.78 (d,  $J = 8.0$  Hz, 1H), 7.48 (dd,  $J = 8.2, 1.4$  Hz, 2H), 7.37 – 7.30 (m, 4H), 7.17 (d,  $J = 7.6$  Hz, 2H), 7.06 – 6.95 (m, 2H), 6.87 – 6.78 (m, 2H), 3.82 (s, 3H).  $^{13}\text{C NMR}$  (150 MHz,  $\text{CDCl}_3$ ):  $\delta$  189.1, 161.2, 155.3, 149.0, 138.9, 137.1, 131.8, 131.6, 130.2, 128.7, 127.8, 124.5, 124.2, 121.1, 119.5, 119.3, 114.1, 112.1, 55.4.

**(3-(3-chlorophenyl)benzo[4,5]imidazo[2,1-b]thiazol-2-yl)(phenyl)methanone (3ag)**



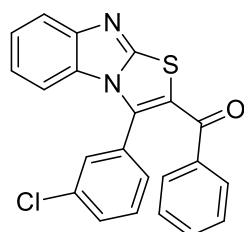

New compound. White crystal, (26.0 mg, 67%), m.p. = 194-196 °C.  $^1\text{H NMR}$  (400 MHz,  $\text{CDCl}_3$ ):  $\delta$  7.79 (td,  $J = 8.4, 0.8$  Hz, 1H), 7.51 (dd,  $J = 8.4, 1.2$  Hz, 2H), 7.43 – 7.29 (m, 6H), 7.22 (t,  $J = 7.6$  Hz, 2H), 7.05 (t,  $J = 8.4$  Hz, 1H), 6.85 (d,  $J = 8.0$  Hz, 1H).  $^{13}\text{C NMR}$  (150 MHz,  $\text{CDCl}_3$ ):  $\delta$  188.6, 155.1, 149.0, 137.0, 136.9, 134.8, 132.3, 130.7, 130.3, 129.9, 129.9, 129.4, 128.5, 128.1, 128.0, 125.0, 124.7, 121.4, 119.6, 111.8. **HRMS** (ESI)  $m/z$ : Calcd for  $\text{C}_{22}\text{H}_{14}\text{ClN}_2\text{OS}$   $[\text{M}+\text{H}]^+$  389.0510, Found 389.0505.

**(3-(3-bromophenyl)benzo[4,5]imidazo[2,1-b]thiazol-2-yl)(phenyl)methanone (3ah)**

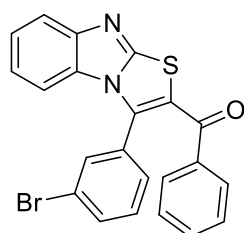

New compound. White crystal, (25.9 mg, 60%), m.p. = 207-209 °C.  $^1\text{H NMR}$  (400 MHz,  $\text{CDCl}_3$ ):  $\delta$  7.80 (d,  $J = 8.0$  Hz, 1H), 7.63 – 7.44 (m, 4H), 7.43 – 7.34 (m, 3H), 7.29 – 7.19 (m, 3H), 7.06 (t,  $J = 7.8$  Hz, 1H), 6.86 (d,  $J = 8.0$  Hz, 1H).  $^{13}\text{C NMR}$  (150 MHz,  $\text{CDCl}_3$ ):  $\delta$  188.6, 155.1, 149.0, 137.0, 136.8, 133.7, 133.2, 132.3, 130.1, 129.9, 129.6, 128.5, 128.5, 128.0, 125.1, 124.8, 122.7, 121.4, 119.6, 111.8. **HRMS** (ESI)  $m/z$ : Calcd for  $\text{C}_{22}\text{H}_{14}\text{BrN}_2\text{OS}$   $[\text{M}+\text{H}]^+$  433.0005, Found 433.0005.

**(3-(3-fluorophenyl)benzo[4,5]imidazo[2,1-b]thiazol-2-yl)(phenyl)methanone (3ai)<sup>1</sup>**

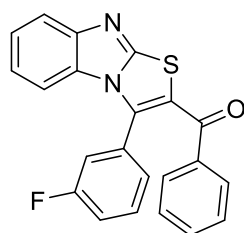

Light yellow crystal, (22.7 mg, 61%), m.p. = 208-210 °C.  $^1\text{H NMR}$  (400 MHz,  $\text{CDCl}_3$ ):  $\delta$  7.79 (d,  $J = 8.4$  Hz, 1H), 7.52 (dd,  $J = 8.2, 1.0$  Hz, 2H), 7.41 – 7.32 (m, 3H), 7.29 – 7.19 (m, 3H), 7.18 – 7.10 (m, 2H), 7.04 (t,  $J = 7.8$  Hz, 1H), 6.84 (d,  $J = 8.4$  Hz, 1H).  $^{13}\text{C NMR}$  (150 MHz,  $\text{CDCl}_3$ ):  $\delta$  188.5, 162.3 (d,  $J = 247.5$  Hz), 155.1, 148.9, 137.0, 136.8, 132.3, 130.6 (d,  $J = 9.0$  Hz), 129.9, 129.7 (d,  $J = 7.5$  Hz), 128.6, 128.0, 126.0 (d,  $J = 4.5$  Hz), 124.8, 124.7, 121.3, 119.5, 117.8 (d,  $J = 21$  Hz), 117.4 (d,  $J = 24$  Hz), 111.8.  $^{19}\text{F NMR}$  (376 MHz,  $\text{CDCl}_3$ ):  $\delta$  -111.16 – -111.22(m).

**(3-(2-fluorophenyl)benzo[4,5]imidazo[2,1-b]thiazol-2-yl)(phenyl)methanone (3aj)**

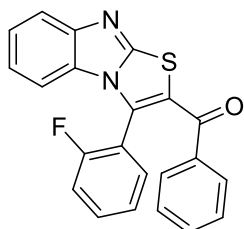

New compound. White crystal, (15.3 mg, 41%), m.p. = 198-200 °C.  $^1\text{H NMR}$  (400 MHz,  $\text{CDCl}_3$ ):  $\delta$  7.79 (d,  $J = 8.4$  Hz, 1H), 7.56 (d,  $J = 7.2$  Hz, 2H), 7.48 – 7.41 (m, 1H), 7.39 – 7.28 (m, 3H), 7.20 (t,  $J = 7.6$  Hz, 2H), 7.15 – 7.02 (m, 3H), 6.83 (d,  $J = 8.4$  Hz, 1H).  $^{13}\text{C NMR}$  (150 MHz,  $\text{CDCl}_3$ ):  $\delta$  188.5, 160.0 (d,  $J = 249.0$  Hz), 155.1, 148.8, 137.0, 133.2 (d,  $J = 7.5$  Hz), 132.4, 132.2, 132.0, 132.0, 130.0, 128.4, 127.9, 125.9, 124.7, 124.6 (d,  $J = 4.5$  Hz), 121.4, 119.4, 116.4 (d,  $J = 15$  Hz), 116.1 (d,  $J = 19.5$  Hz), 111.4.  $^{19}\text{F NMR}$  (376 MHz,  $\text{CDCl}_3$ ):  $\delta$  -110.88 – -110.94 (m). **HRMS** (ESI)  $m/z$ : Calcd for  $\text{C}_{22}\text{H}_{14}\text{FN}_2\text{OS}$   $[\text{M}+\text{H}]^+$  373.0805, Found 373.0806.

**(3-(2-chlorophenyl)benzo[4,5]imidazo[2,1-b]thiazol-2-yl)(phenyl)methanone (3ak)<sup>1</sup>**

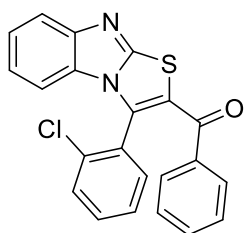

Yellow crystal, (14.7 mg, 38%), m.p. = 190-192 °C.  $^1\text{H NMR}$  (400 MHz,  $\text{CDCl}_3$ ):  $\delta$  7.78 (d,  $J = 8.4$  Hz, 1H), 7.65 – 7.55 (m, 2H), 7.47 (dd,  $J = 8.2, 1.0$  Hz, 1H), 7.41 – 7.31 (m, 3H), 7.29 – 7.24 (m, 1H), 7.23 – 7.17 (m, 3H), 7.03 (t,  $J = 8.2$  Hz, 1H), 6.63 (d,  $J = 8.4$  Hz, 1H).  $^{13}\text{C NMR}$  (150 MHz,  $\text{CDCl}_3$ ):  $\delta$  188.6, 154.9, 148.7, 137.3, 135.4, 134.5, 132.4, 132.1, 132.1, 129.9, 129.9, 128.2, 127.9, 127.6, 127.1, 125.9, 124.7, 121.5, 119.4, 111.4.

**(4-bromophenyl)(3-phenylbenzo[4,5]imidazo[2,1-b]thiazol-2-yl)methanone (3al)<sup>1</sup>**

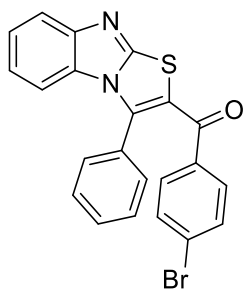

Light yellow crystal, (25.0 mg, 58%), m.p. = 200-202 °C.  $^1\text{H NMR}$  (400 MHz,  $\text{CDCl}_3$ ):  $\delta$  7.79 (d,  $J = 8.4$  Hz, 1H), 7.54 – 7.45 (m, 1H), 7.43 – 7.27 (m, 9H), 7.02 (t,  $J = 7.8$  Hz, 1H), 6.85 (d,  $J = 8.4$  Hz, 1H).  $^{13}\text{C NMR}$  (150 MHz,  $\text{CDCl}_3$ ):  $\delta$  187.9, 155.2, 149.0, 139.0, 135.8, 131.1, 130.8, 130.1, 130.1, 128.8, 127.6, 126.9, 124.7, 124.4, 121.3, 119.5, 112.1.

**(3-phenylbenzo[4,5]imidazo[2,1-b]thiazol-2-yl)(p-tolyl)methanone (3am)<sup>1</sup>**

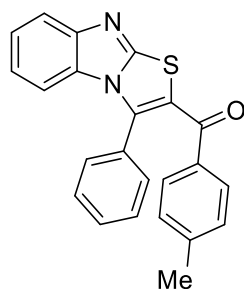

Light yellow crystal, (23.7 mg, 64%), m.p. = 191-192 °C. <sup>1</sup>H NMR (400 MHz, CDCl<sub>3</sub>): δ 7.78 (d, *J* = 8.0 Hz, 1H), 7.48 – 7.40 (m, 5H), 7.40 – 7.31 (m, 3H), 7.04 – 6.94 (m, 3H), 6.86 (d, *J* = 8.0 Hz, 1H), 2.29 (s, 3H). <sup>13</sup>C NMR (150 MHz, CDCl<sub>3</sub>): δ 188.4, 155.3, 148.9, 143.0, 138.2, 134.3, 130.4, 130.1, 130.1, 129.0, 128.6, 128.5, 127.9, 124.5, 124.2, 121.0, 119.3, 112.0, 109.9.

**(3-phenylbenzo[4,5]imidazo[2,1-b]thiazol-2-yl)(4-(trifluoromethyl)phenyl)methanone (3an)<sup>1</sup>**

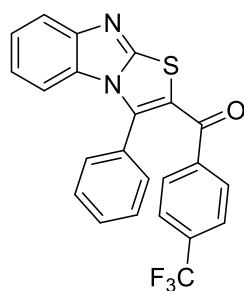

Light yellow crystal, (16.9 mg, 40%), m.p. = 270-271 °C. <sup>1</sup>H NMR (400 MHz, CDCl<sub>3</sub>): δ 7.78 (d, *J* = 8.4 Hz, 1H), 7.48 (d, *J* = 8.4 Hz, 2H), 7.45 – 7.39 (m, 1H), 7.38 – 7.29 (m, 7H), 7.01 (d, *J* = 7.8 Hz, 1H), 6.81 (d, *J* = 8.4 Hz, 1H). <sup>13</sup>C NMR (150 MHz, CDCl<sub>3</sub>): δ 188.1, 155.1, 149.1, 140.3, 139.7, 132.9 (d, *J* = 31.5 Hz), 130.9, 130.1, 128.8, 128.6, 127.3, 124.9, 124.9, 124.7 (q, *J* = 12.0 Hz), 123.3 (d, *J* = 270.0 Hz), 121.4, 119.5, 112.0. <sup>19</sup>F NMR (376 MHz, CDCl<sub>3</sub>): δ -63.79 (s).

**(4-nitrophenyl)(3-phenylbenzo[4,5]imidazo[2,1-b]thiazol-2-yl)methanone (3ao)<sup>1</sup>**

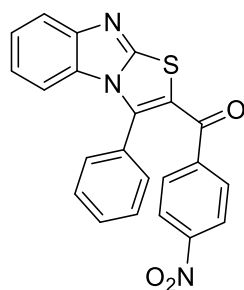

Orange crystal, (17.9 mg, 45%), m.p. = 179-181 °C. <sup>1</sup>H NMR (400 MHz, CDCl<sub>3</sub>): δ 7.95 (d, *J* = 8.8 Hz, 2H), 7.79 (d, *J* = 8.0 Hz, 1H), 7.53 (d, *J* = 8.8 Hz, 2H), 7.47 – 7.30 (m, 6H), 7.03 (t, *J* = 7.8 Hz, 1H), 6.80 (d, *J* = 8.4 Hz, 1H). <sup>13</sup>C NMR (150 MHz, CDCl<sub>3</sub>): δ 187.4, 155.1, 149.1, 148.9, 142.5, 140.0, 131.2, 130.1, 130.0, 129.2, 128.9, 127.2, 125.1, 124.8, 122.9, 121.5, 119.7, 112.0.

**(3-(naphthalen-2-yl)benzo[4,5]imidazo[2,1-b]thiazol-2-yl)(phenyl)methanone (3ap)<sup>1</sup>**

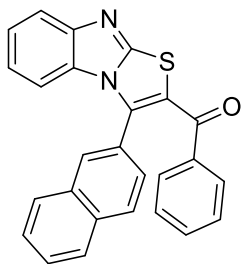

Yellow crystal, (18.2 mg, 45%), m.p. = 192-194 °C. **<sup>1</sup>H NMR** (400 MHz, CDCl<sub>3</sub>): δ 7.92 – 7.76 (m, 4H), 7.70 (d, *J* = 8.4 Hz, 1H), 7.63 – 7.42 (m, 5H), 7.33 (t, *J* = 7.6 Hz, 1H), 7.04 (t, *J* = 7.4 Hz, 1H), 7.00 – 6.91 (m, 3H), 6.86 (d, *J* = 8.0 Hz, 1H). **<sup>13</sup>C NMR** (150 MHz, CDCl<sub>3</sub>): δ 189.1, 155.4, 149.0, 138.8, 137.1, 133.6, 132.3, 131.7, 131.0, 130.1, 128.5, 128.4, 128.2, 127.8, 127.7, 127.7, 127.0, 125.9, 124.8, 124.6, 121.2, 119.4, 112.2.

**(3-(naphthalen-1-yl)benzo[4,5]imidazo[2,1-b]thiazol-2-yl)(phenyl)methanone (3aq)**

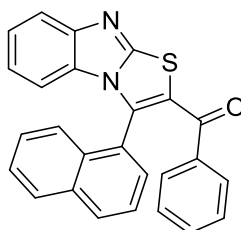

New compound. Light yellow crystal, (20.4 mg, 50%), m.p. = 244-245 °C. **<sup>1</sup>H NMR** (600 MHz, CDCl<sub>3</sub>): δ 7.87 (t, *J* = 9.6 Hz, 2H), 7.75 (d, *J* = 7.8 Hz, 1H), 7.59 (d, *J* = 8.4 Hz, 1H), 7.56 – 7.52 (m, 1H), 7.48 – 7.44 (m, 1H), 7.39 (dd, *J* = 7.2, 1.2 Hz, 1H), 7.33 – 7.27 (m, 3H), 7.26 – 7.22 (m, 1H), 7.09 – 7.05 (m, 1H), 6.81 – 6.73 (m, 3H), 6.07 (d, *J* = 8.4 Hz, 1H). **<sup>13</sup>C NMR** (150 MHz, CDCl<sub>3</sub>): δ 189.2, 155.2, 148.9, 137.6, 137.2, 133.1, 131.6, 131.5, 131.2, 129.9, 129.8, 128.7, 128.0, 127.7, 127.2, 126.8, 126.4, 125.3, 124.9, 124.5, 124.5, 121.2, 119.2, 112.1. **HRMS** (ESI) *m/z*: Calcd for C<sub>26</sub>H<sub>17</sub>N<sub>2</sub>OS [M+H]<sup>+</sup> 405.1056, Found 405.1056.

**phenyl(3-(thiophen-2-yl)benzo[4,5]imidazo[2,1-b]thiazol-2-yl)methanone (3ar)**

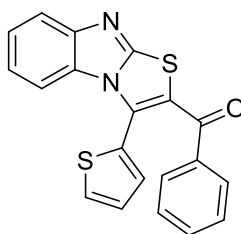

New compound. Light yellow crystal, (17.3 mg, 48%), m.p. = 196-197 °C. **<sup>1</sup>H NMR** (400 MHz, CDCl<sub>3</sub>): δ 7.78 (d, *J* = 8.4 Hz, 1H), 7.60 (dd, *J* = 8.2, 1.0 Hz, 2H), 7.48 (dd, *J* = 5.0, 1.0 Hz, 1H), 7.44 – 7.33 (m, 2H), 7.29 – 7.21 (m, 3H), 7.11 – 6.98 (m, 3H). **<sup>13</sup>C NMR** (150 MHz, CDCl<sub>3</sub>): δ 188.6, 154.6, 148.8, 137.1, 132.3, 131.0, 130.2, 130.0, 128.5, 128.0, 127.4, 126.7, 126.7, 124.6, 121.3, 119.4, 112.0. **HRMS** (ESI) *m/z*: Calcd for C<sub>20</sub>H<sub>13</sub>N<sub>2</sub>OS<sub>2</sub> [M+H]<sup>+</sup> 361.0464, Found 361.0464.

**phenyl(3-(pyridin-2-yl)benzo[4,5]imidazo[2,1-b]thiazol-2-yl)methanone(3as)**

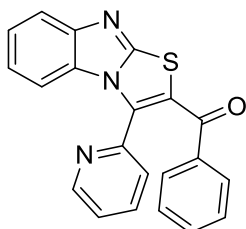

New compound. Light yellow crystal, (19.2 mg, 54%), m.p. = 192-194 °C. **<sup>1</sup>H NMR** (600 MHz, CDCl<sub>3</sub>): δ 8.77 (d, *J* = 4.8 Hz, 1H), 7.77 (d, *J* = 8.4 Hz, 1H), 7.55 – 7.45 (m, 3H), 7.35 – 7.28 (m, 3H), 7.24 (t, *J* = 7.8 Hz, 1H), 7.14 (t, *J* = 7.8 Hz, 2H), 7.04 (t, *J* = 7.8 Hz, 1H), 6.88 (d, *J* = 7.8 Hz, 1H). **<sup>13</sup>C NMR** (150 MHz, CDCl<sub>3</sub>): δ 188.5, 155.1, 149.8, 148.9, 147.2, 137.1, 137.0, 136.4, 132.2, 130.0, 128.9, 127.9, 127.1, 125.9, 125.0, 124.6, 121.2, 119.3, 112.6. **HRMS** (ESI) *m/z*: Calcd for C<sub>21</sub>H<sub>14</sub>N<sub>3</sub>OS [M+H]<sup>+</sup> 356.0852, Found 356.0852.

**(3-(furan-2-yl)benzo[4,5]imidazo[2,1-b]thiazol-2-yl)(phenyl)methanone (3at)**

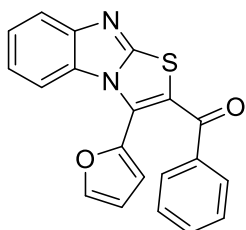

New compound. Orange solid, (18.2 mg, 53%), m.p. = 163-164 °C. **<sup>1</sup>H NMR** (600 MHz, CDCl<sub>3</sub>): δ 7.79 (d, *J* = 7.8 Hz, 1H), 7.60 (dd, *J* = 8.4, 1.2 Hz, 2H), 7.57 – 7.55 (m, 1H), 7.43 – 7.36 (m, 2H), 7.29 (t, *J* = 7.8 Hz, 2H), 7.17 – 7.12 (m, 2H), 6.50 (d, *J* = 3.0 Hz, 1H), 6.32 (dd, *J* = 3.6, 1.8 Hz, 1H). **<sup>13</sup>C NMR** (150 MHz, CDCl<sub>3</sub>): δ 188.3, 154.5, 148.6, 144.4, 139.1, 137.1, 132.4, 129.8, 128.6, 128.1, 127.5, 127.1, 124.7, 121.6, 119.4, 117.2, 112.1, 112.0. **HRMS** (ESI) *m/z*: Calcd for C<sub>20</sub>H<sub>13</sub>N<sub>2</sub>O<sub>2</sub>S [M+H]<sup>+</sup> 345.0692, Found 345.0685.

**(3-(3,4-dichlorophenyl)benzo[4,5]imidazo[2,1-b]thiazol-2-yl)(phenyl)methanone (3au)<sup>1</sup>**

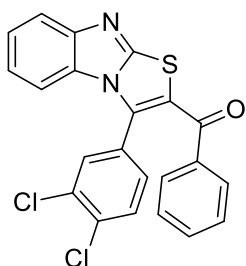

Yellow solid, (19.0 mg, 45%), m.p. = 200-201 °C. **<sup>1</sup>H NMR** (400 MHz, CDCl<sub>3</sub>): δ 7.78 (d, *J* = 8.0 Hz, 1H), 7.62 – 7.39 (m, 5H), 7.39 – 7.30 (m, 2H), 7.25 (d, *J* = 7.8 Hz, 2H), 7.07 (t, *J* = 7.7 Hz, 1H), 6.89 (d, *J* = 8.0 Hz, 1H). **<sup>13</sup>C NMR** (150 MHz, CDCl<sub>3</sub>): δ 188.2, 154.9, 148.9, 137.0, 135.8, 135.2, 133.2, 132.3, 132.1, 130.7, 129.7, 129.0, 128.5, 128.1, 127.4, 125.0, 124.8, 121.5, 119.6, 111.7.

**(6,7-dichloro-3-phenylbenzo[4,5]imidazo[2,1-b]thiazol-2-yl)(phenyl)methanone (3av)<sup>1</sup>**

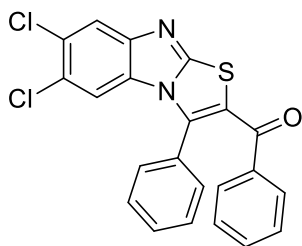

White crystal, (14.9 mg, 35%), m.p. = 218-220 °C.  $^1\text{H NMR}$  (600 MHz,  $\text{CDCl}_3$ ):  $\delta$  7.84 (s, 1H), 7.48 (dd,  $J = 8.4, 1.2$  Hz, 2H), 7.46 – 7.42 (m, 1H), 7.39 – 7.30 (m, 5H), 7.15 (d,  $J = 7.8$  Hz, 2H), 6.91 (s, 1H).  $^{13}\text{C NMR}$  (150 MHz,  $\text{CDCl}_3$ ):  $\delta$  188.6, 157.0, 148.0, 138.0, 136.6, 132.3, 131.1, 129.9, 128.9, 128.9, 128.8, 128.7, 127.9, 127.0, 125.5, 125.0, 120.3, 113.2.

**(7-methoxy-3-phenylbenzo[4,5]imidazo[2,1-b]thiazol-2-yl)(phenyl)methanone (3aw) and (6-methoxy-3-phenylbenzo[4,5]imidazo[2,1-b]thiazol-2-yl)(phenyl)methanone (3aw')<sup>1</sup>**

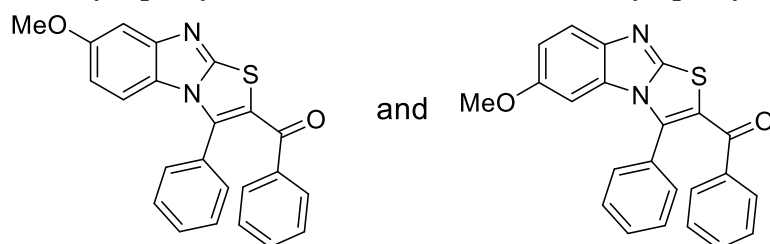

Yellow crystal, (26.1 mg, 68%).  $^1\text{H NMR}$  (600 MHz,  $\text{CDCl}_3$ ):  $\delta$  7.64 (d,  $J = 8.4$  Hz, 1H), 7.51 – 7.44 (m, 4H), 7.44 – 7.36 (m, 6H), 7.36 – 7.27 (m, 6H), 7.23 (d,  $J = 2.4$  Hz, 1H), 7.13 (q,  $J = 7.8$  Hz, 4H), 6.95 (dd,  $J = 9.0, 2.4$  Hz, 1H), 6.71 (d,  $J = 9.0$  Hz, 1H), 6.62 (dd,  $J = 9.0, 2.4$  Hz, 1H), 6.28 (d,  $J = 2.4$  Hz, 1H), 3.83 (s, 3H), 3.57 (s, 3H).  $^{13}\text{C NMR}$  (150 MHz,  $\text{CDCl}_3$ ):  $\delta$  188.9, 188.9, 157.5, 155.5, 154.7, 153.8, 150.1, 143.3, 138.5, 138.4, 137.0, 131.9, 131.8, 130.5, 130.5, 130.3, 130.2, 130.0, 128.6, 128.6, 128.5, 127.8, 127.7, 127.7, 127.7, 124.4, 124.0, 119.6, 113.0, 112.3, 110.5, 101.8, 96.6, 55.6, 55.4.

**(7-methyl-3-phenylbenzo[4,5]imidazo[2,1-b]thiazol-2-yl)(phenyl)methanone (3ax) and (6-methyl-3-phenylbenzo[4,5]imidazo[2,1-b]thiazol-2-yl)(phenyl)methanone (3ax')<sup>1</sup>**

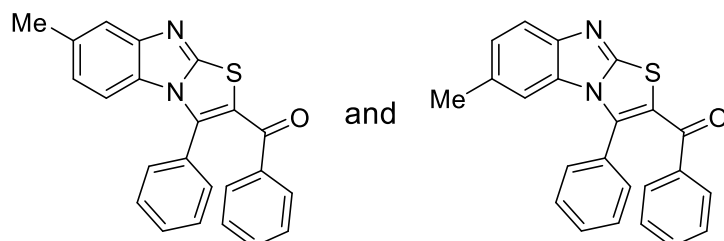

Yellow crystal, (21.0 mg, 57%).  $^1\text{H NMR}$  (600 MHz,  $\text{CDCl}_3$ ):  $\delta$  7.64 (d,  $J = 8.4$  Hz, 1H), 7.55 (s, 1H), 7.49 – 7.45 (m, 4H), 7.43 – 7.36 (m, 6H), 7.35 – 7.27 (m, 6H), 7.16 – 7.10 (m, 5H), 6.81 (d,  $J = 9.0$  Hz, 1H), 6.70 (d,  $J = 8.4$  Hz, 1H), 6.59 (s, 1H), 2.44 (s, 3H), 2.27 (s, 3H).  $^{13}\text{C NMR}$  (150 MHz,  $\text{CDCl}_3$ ):  $\delta$  189.0, 155.3, 154.7, 149.3, 147.1, 138.7, 137.0, 134.6, 131.9, 131.9, 131.0, 130.6, 130.5, 130.2, 130.1, 130.1, 128.6, 128.6, 128.5, 128.1, 127.8, 127.8, 126.0, 124.4, 124.2, 122.5, 119.2, 118.8, 112.1, 111.5, 21.8, 21.6.

## 5. NMR Spectra

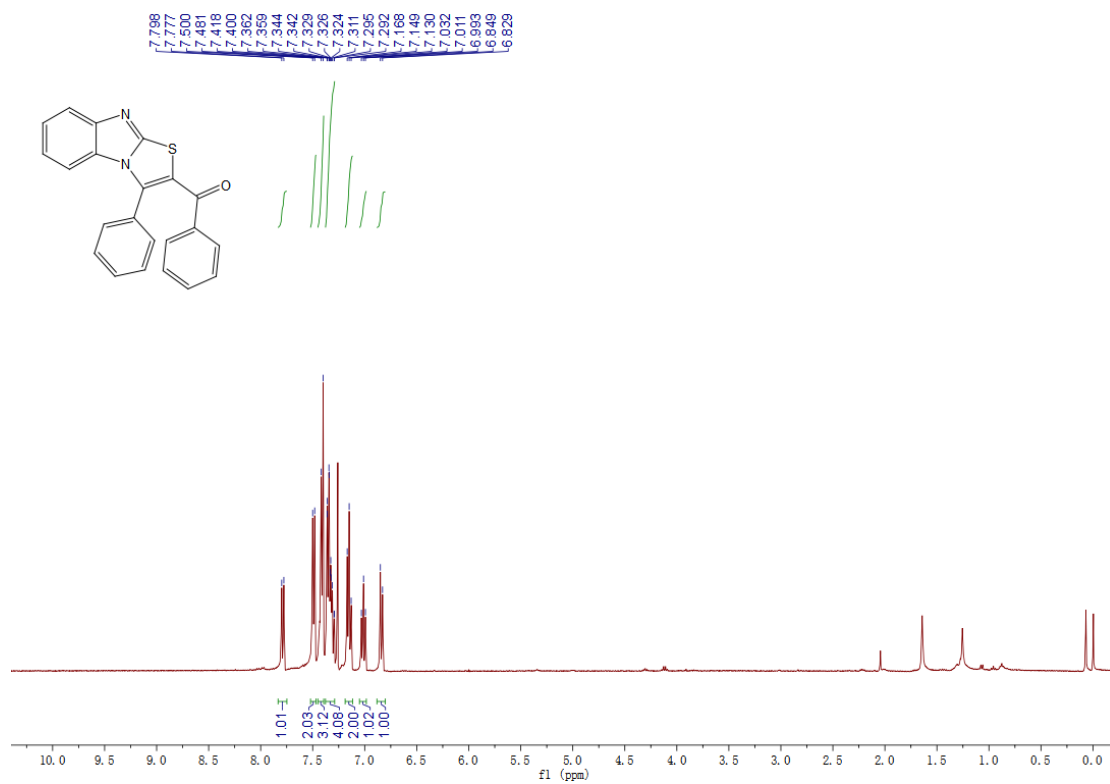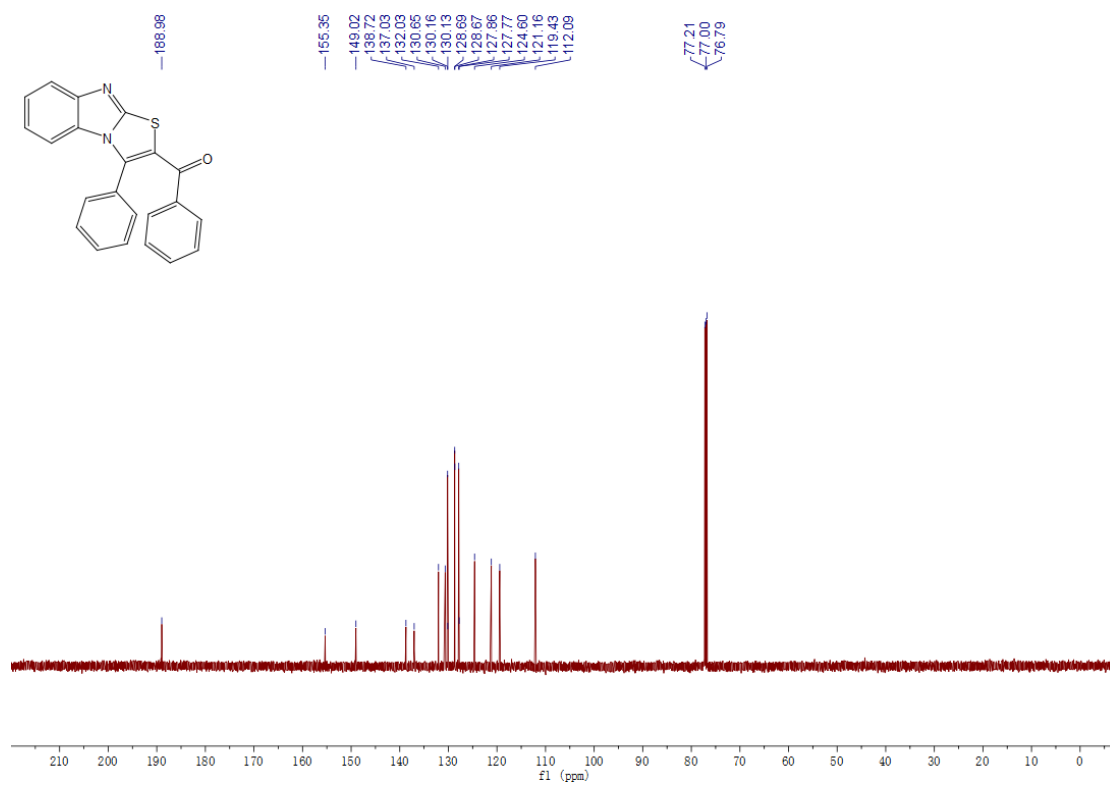

$^1\text{H}$  NMR(400 MHz),  $^{13}\text{C}$  NMR(150 MHz) of compound 3aa in  $\text{CDCl}_3$

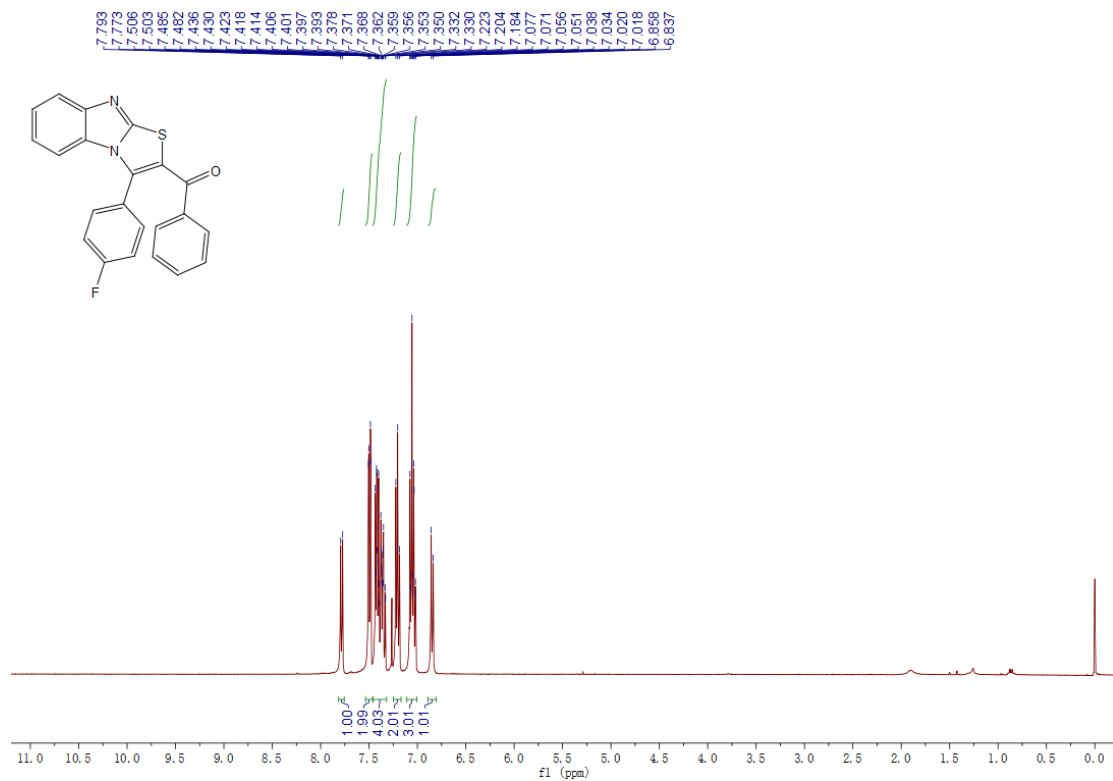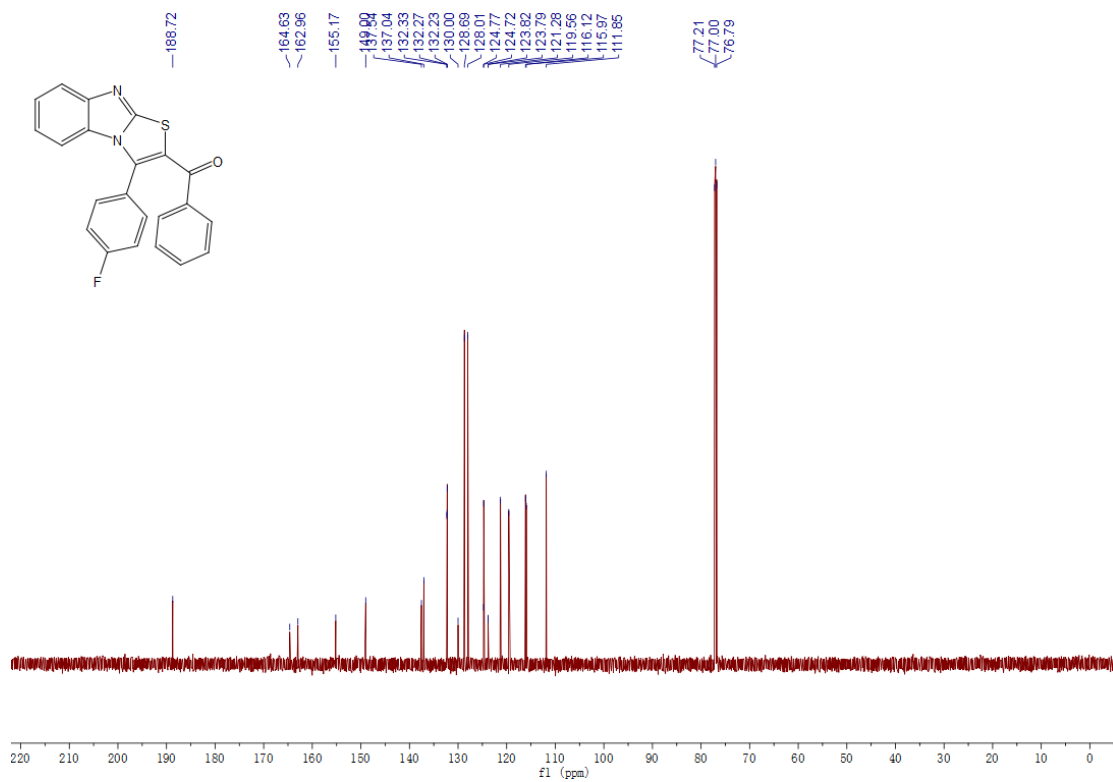

**<sup>1</sup>H NMR(400 MHz)、<sup>13</sup>C NMR(150 MHz) of compound 3ab in CDCl<sub>3</sub>**



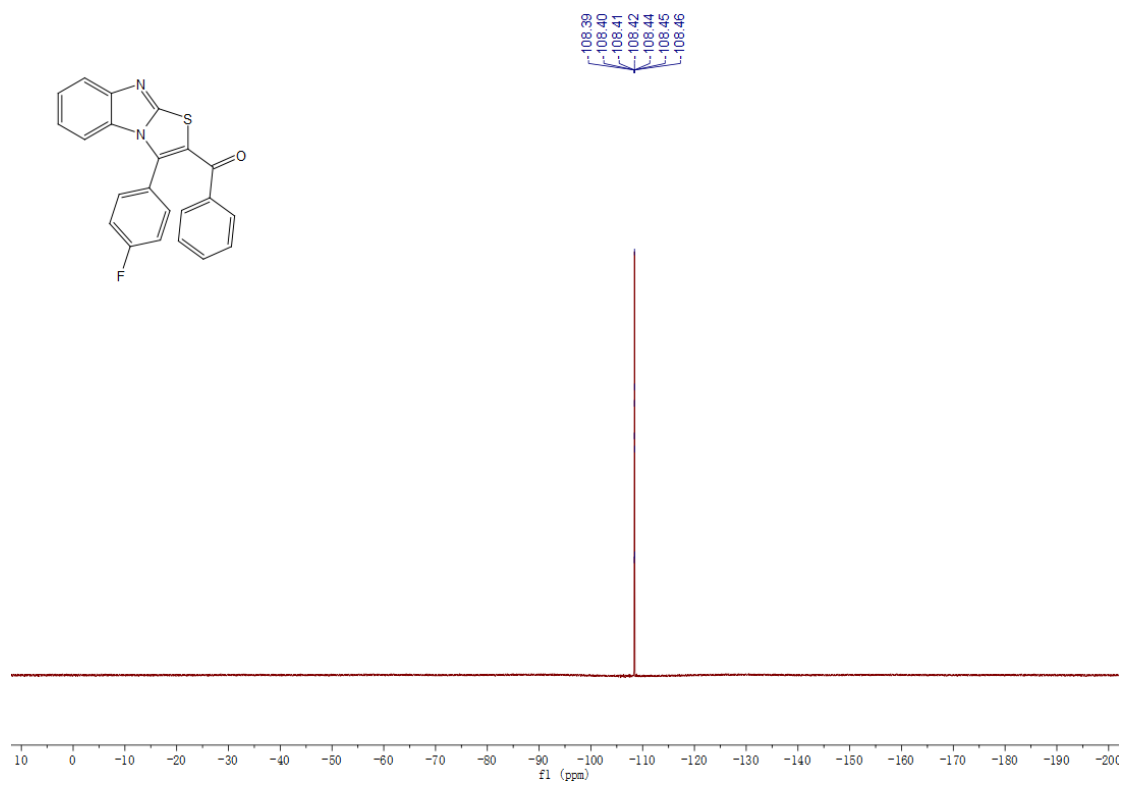

**$^{19}\text{F}$  NMR of compound 3ab in  $\text{CDCl}_3$  (376 MHz)**

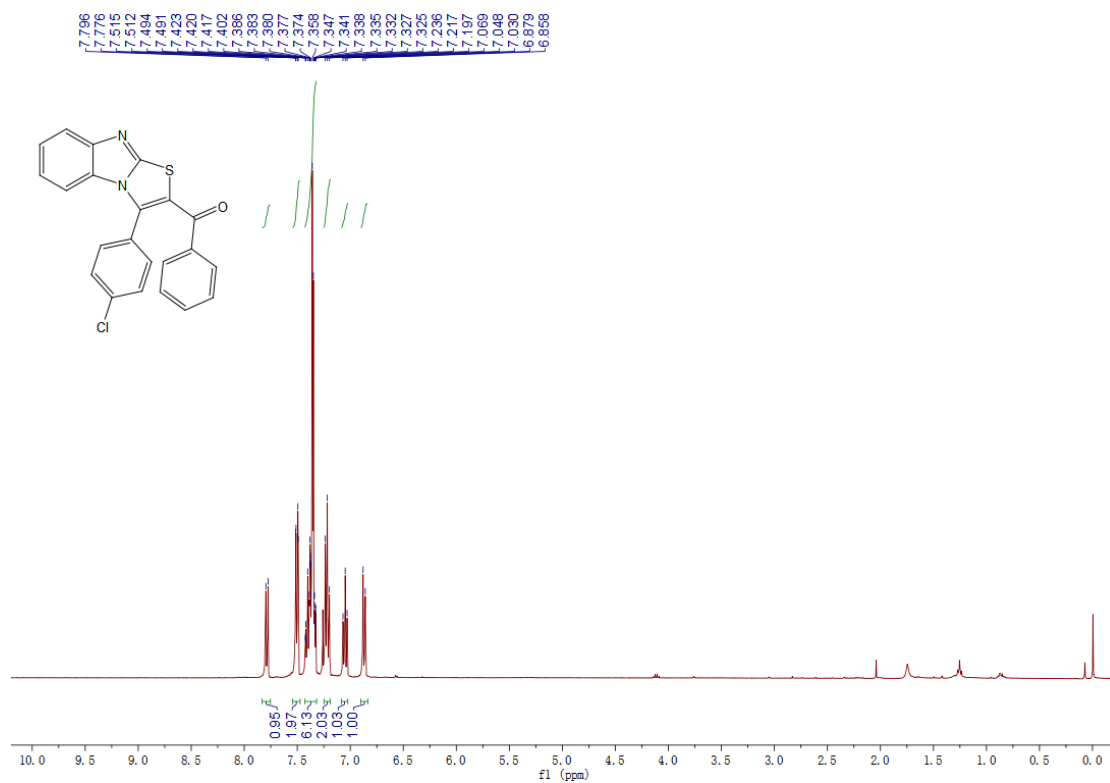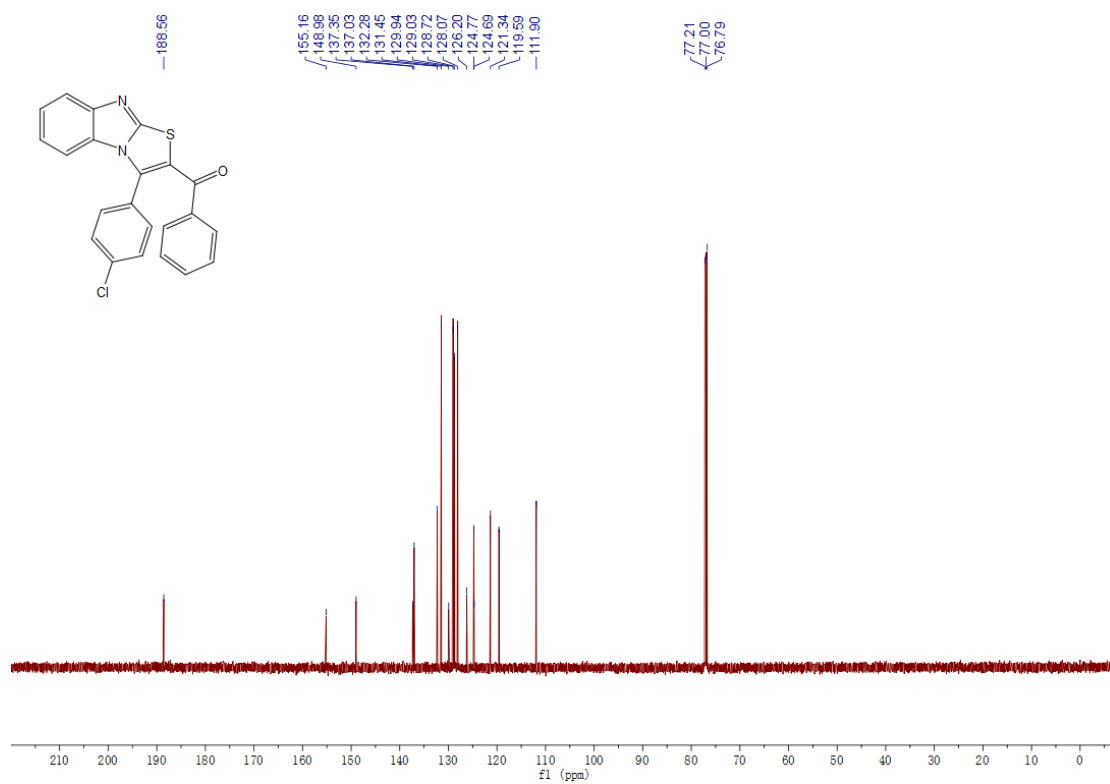

<sup>1</sup>H NMR(400 MHz)、<sup>13</sup>C NMR(150 MHz) of compound 3ac in CDCl<sub>3</sub>

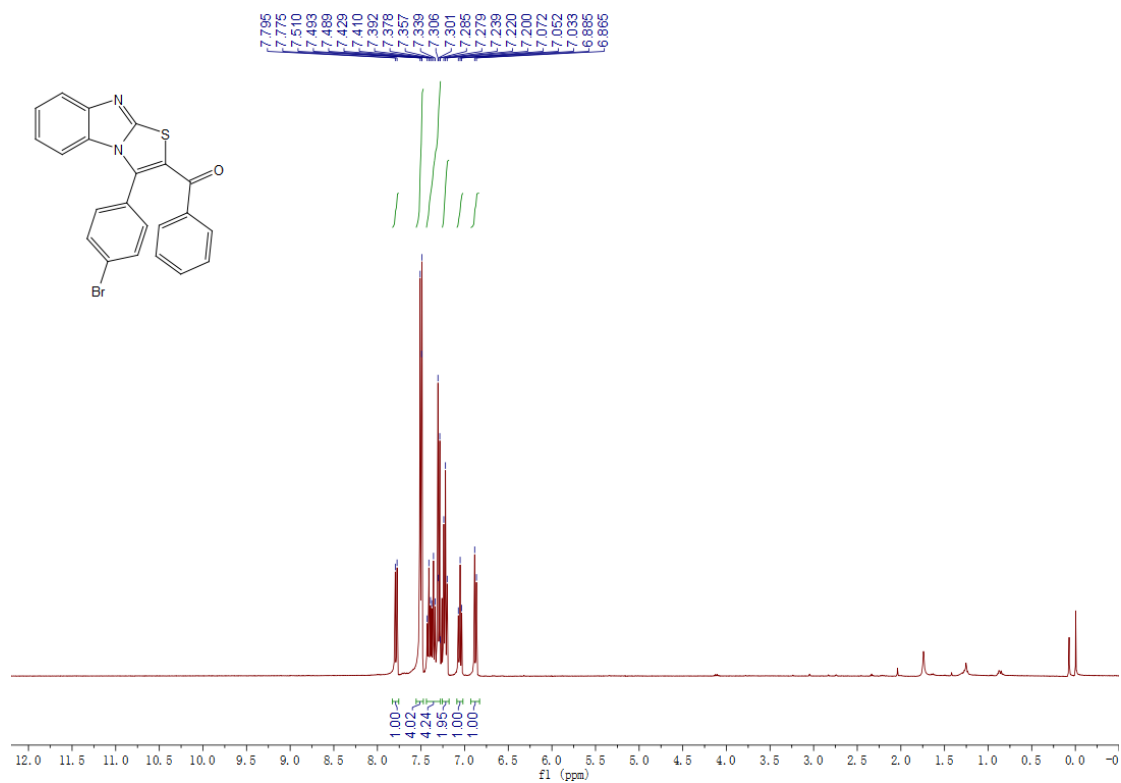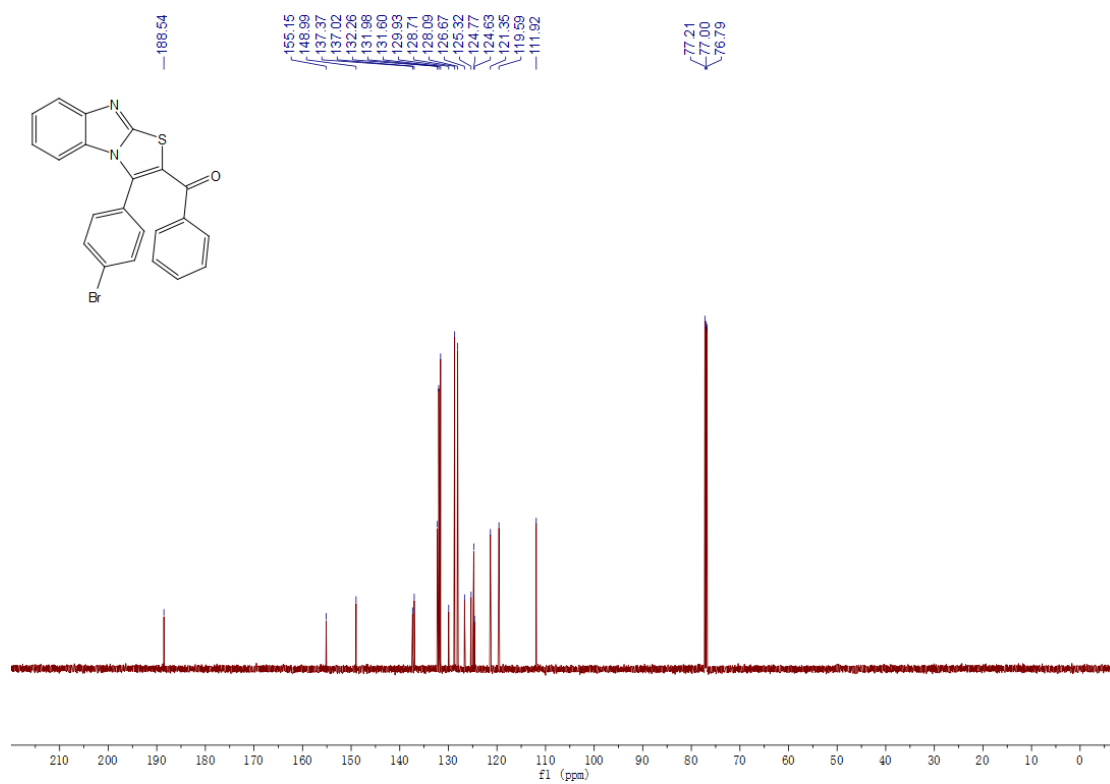

$^1\text{H NMR}$ (400 MHz)、 $^{13}\text{C NMR}$ (150 MHz) of compound 3ad in  $\text{CDCl}_3$

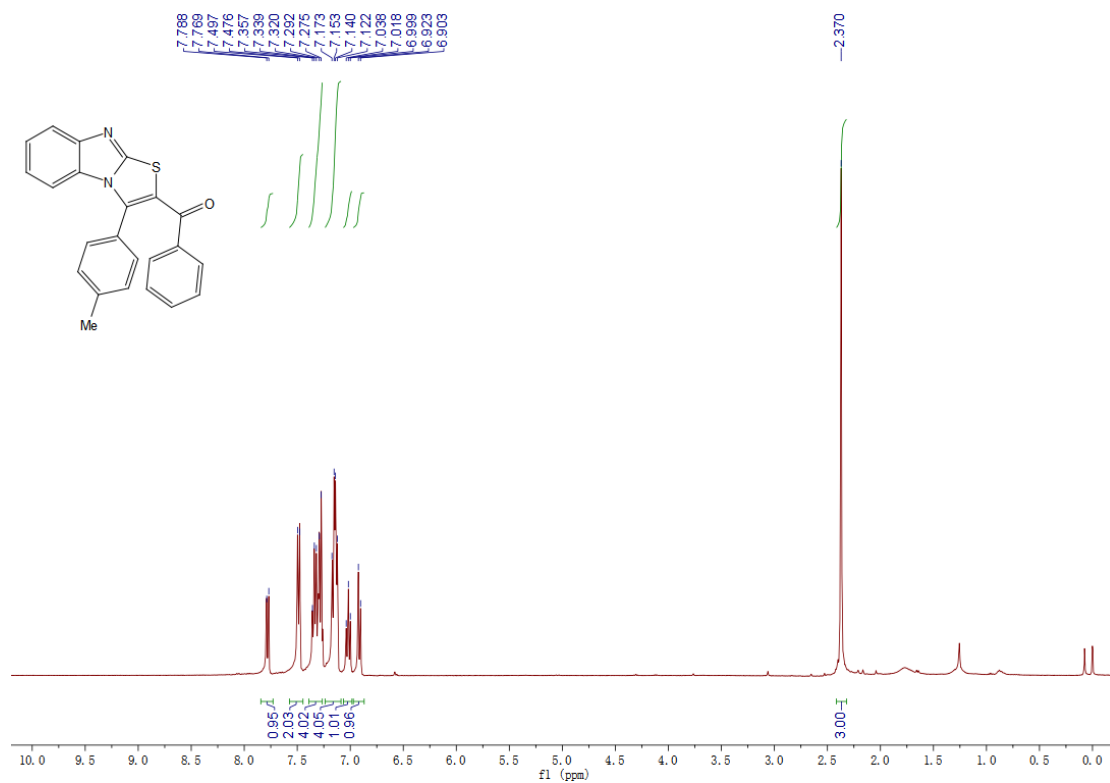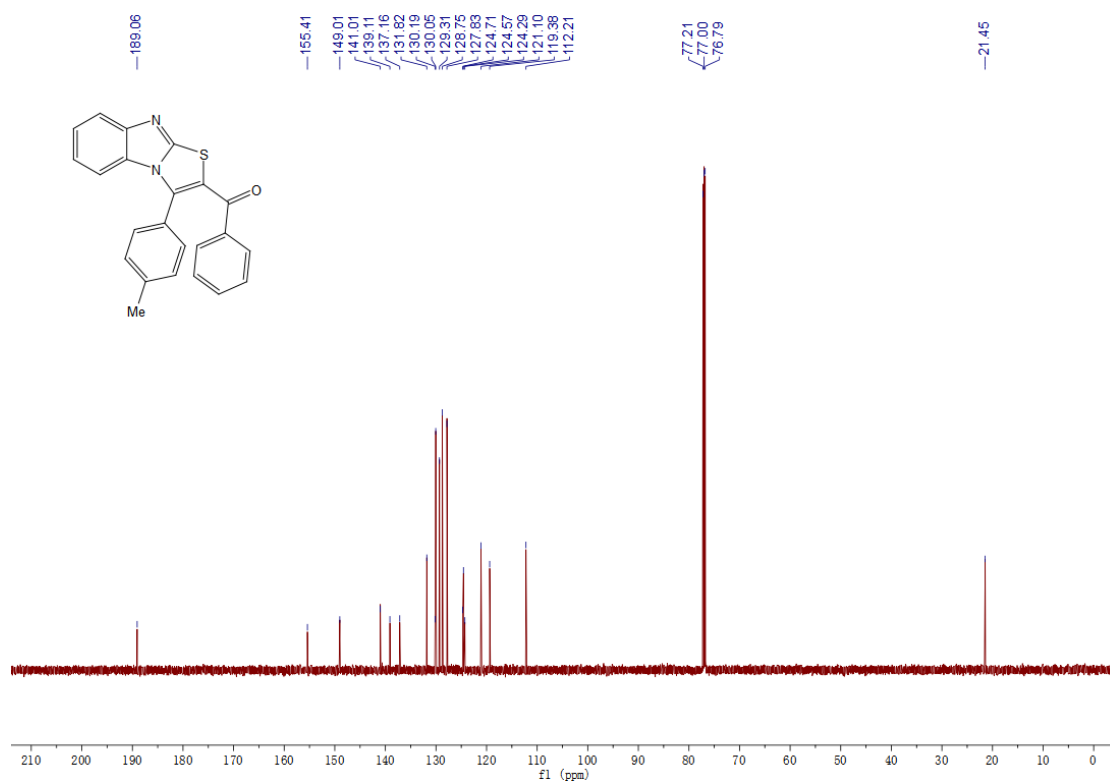

$^1\text{H NMR}$ (400 MHz)、 $^{13}\text{C NMR}$ (150 MHz) of compound 3ae in  $\text{CDCl}_3$

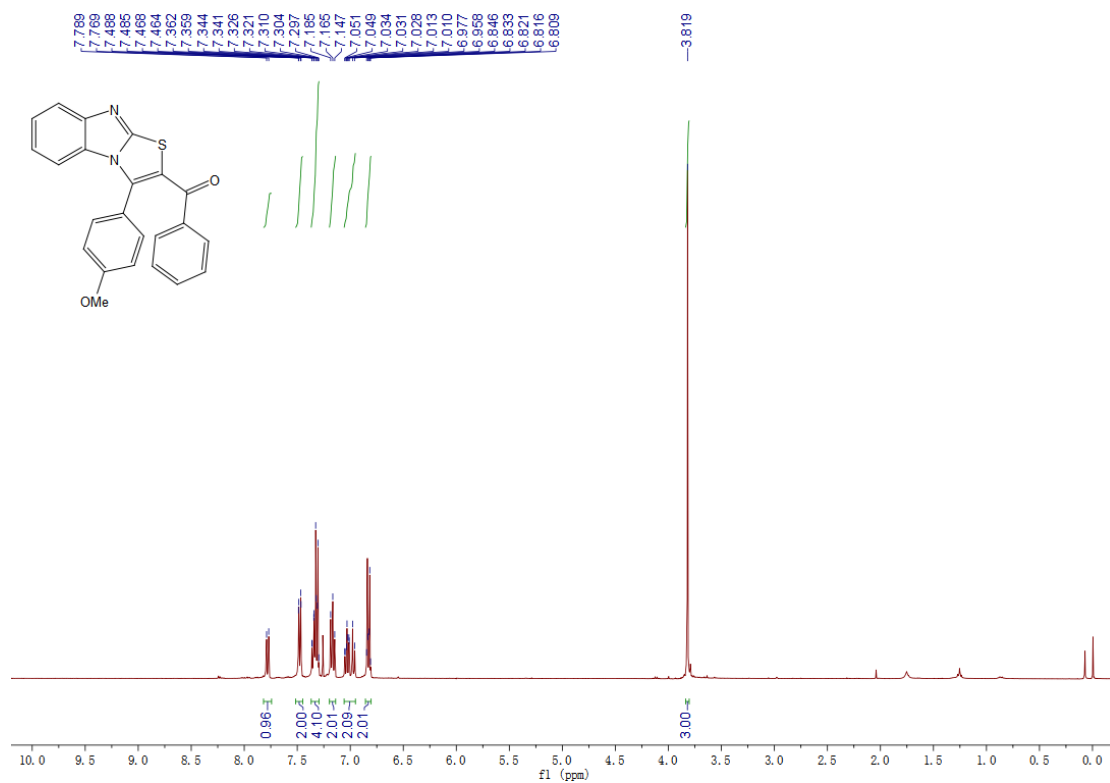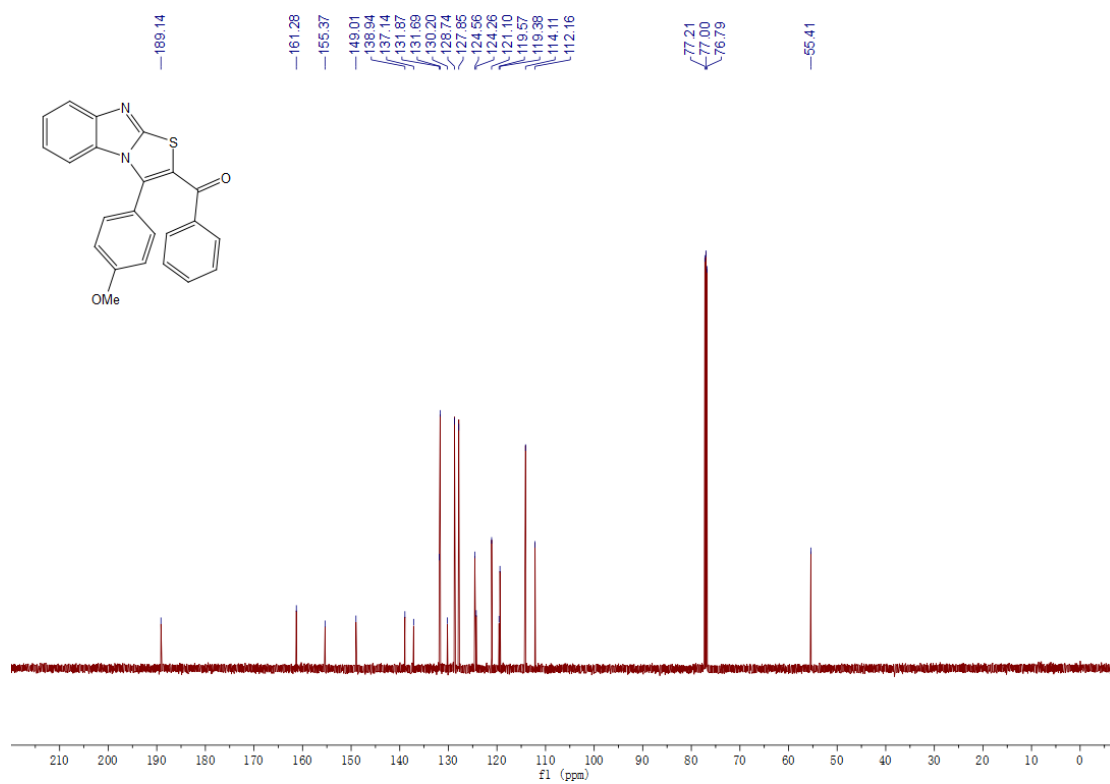

<sup>1</sup>H NMR(400 MHz)、<sup>13</sup>C NMR(150 MHz) of compound 3af in CDCl<sub>3</sub>

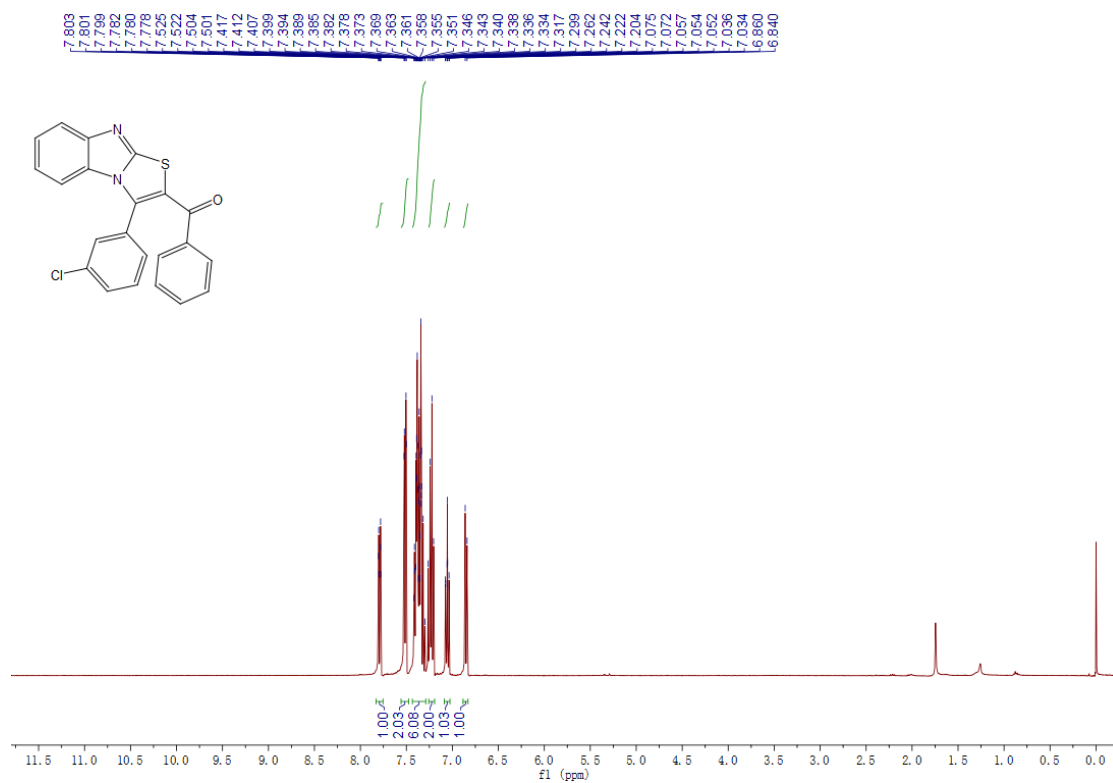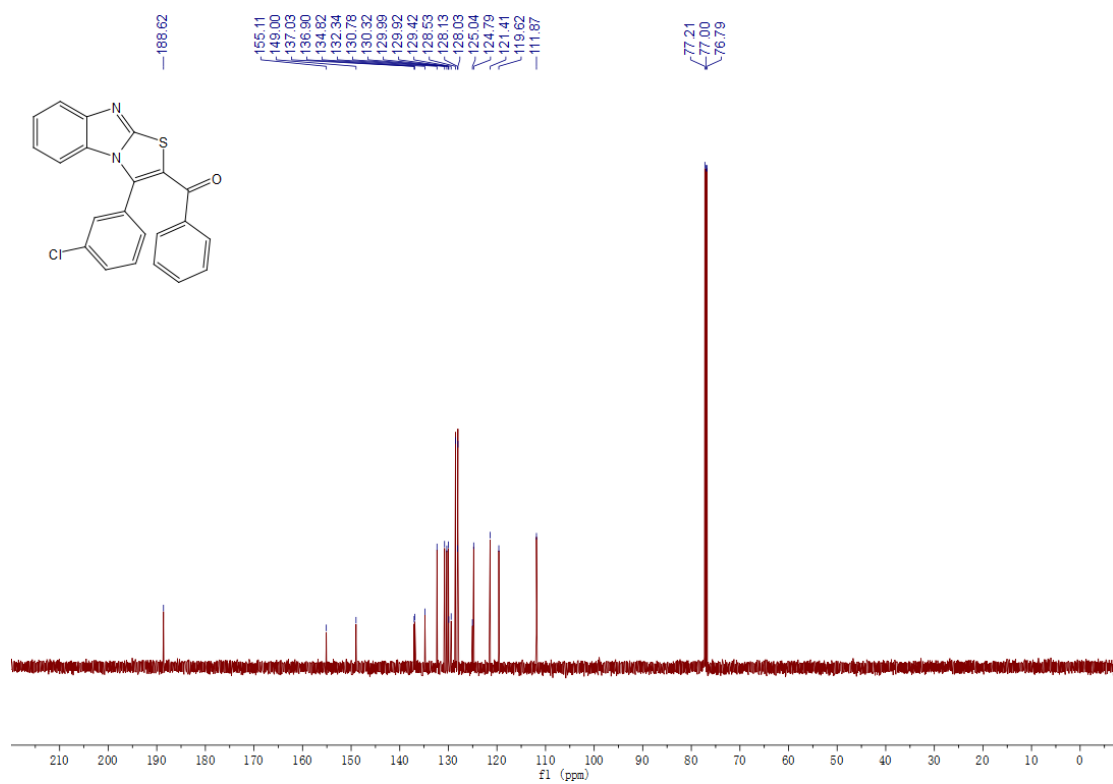

**<sup>1</sup>H NMR(400 MHz)、<sup>13</sup>C NMR(150 MHz) of compound 3ag in CDCl<sub>3</sub>**

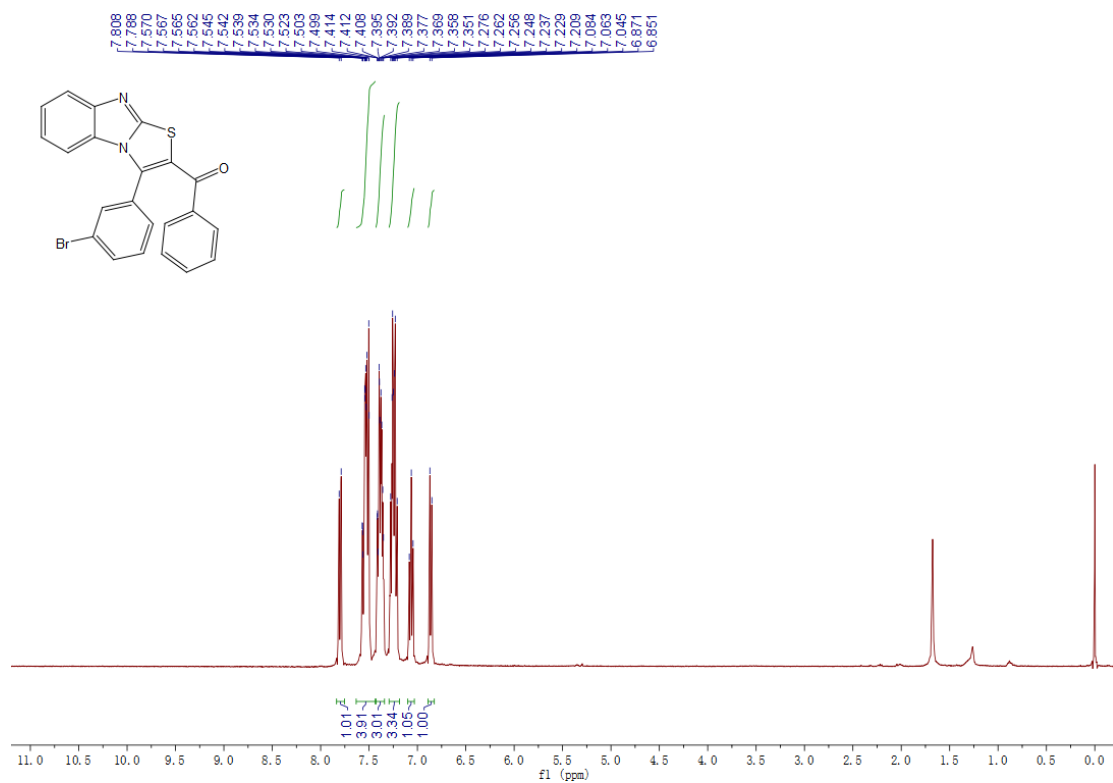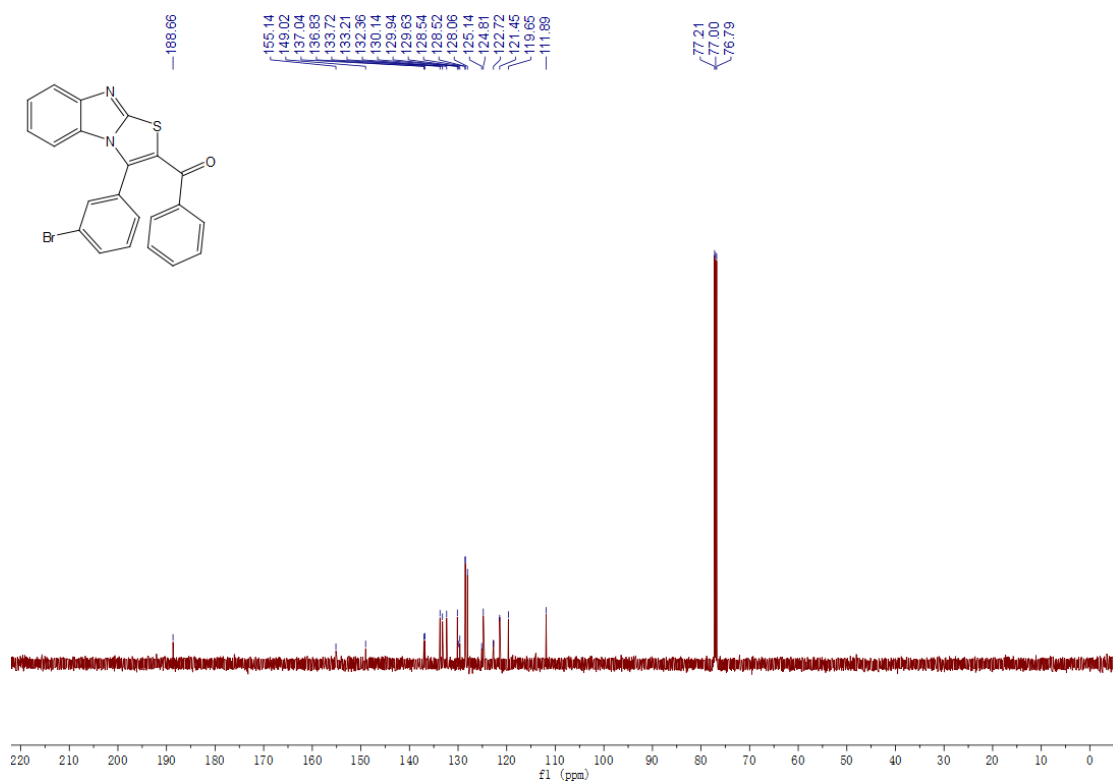

<sup>1</sup>H NMR(400 MHz)、<sup>13</sup>C NMR(150 MHz) of compound 3ah in CDCl<sub>3</sub>

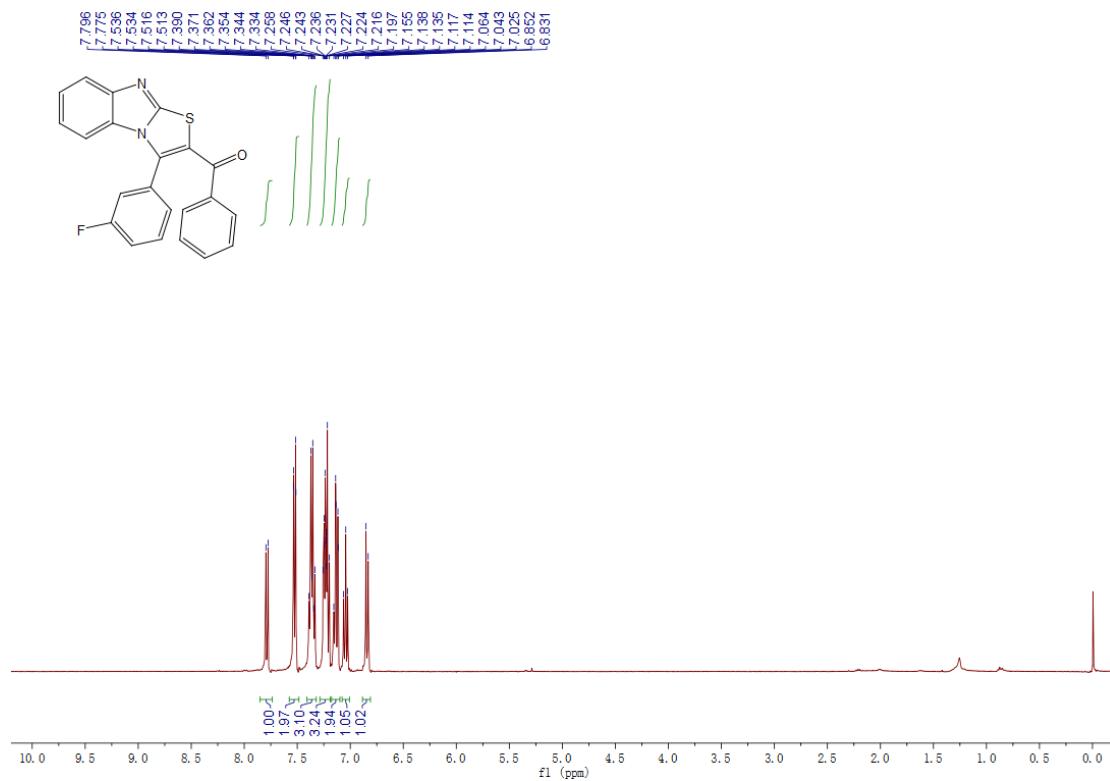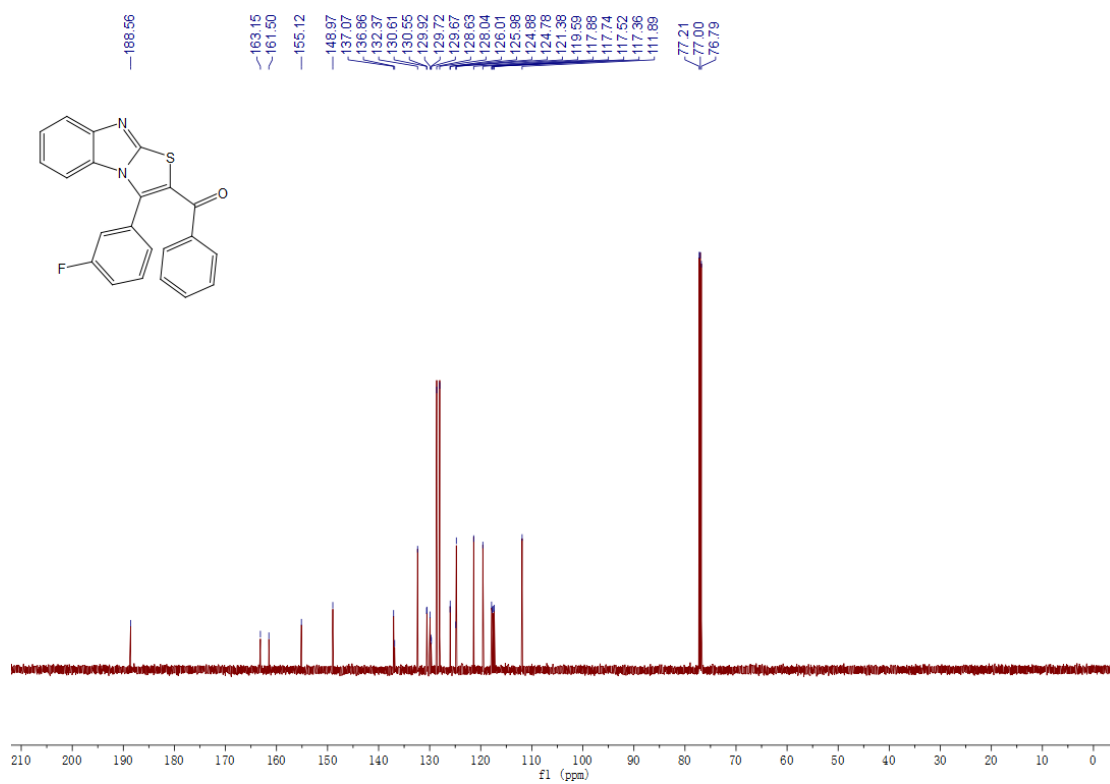

**<sup>1</sup>H NMR(400 MHz), <sup>13</sup>C NMR(150 MHz) of compound 3ai in CDCl<sub>3</sub>**



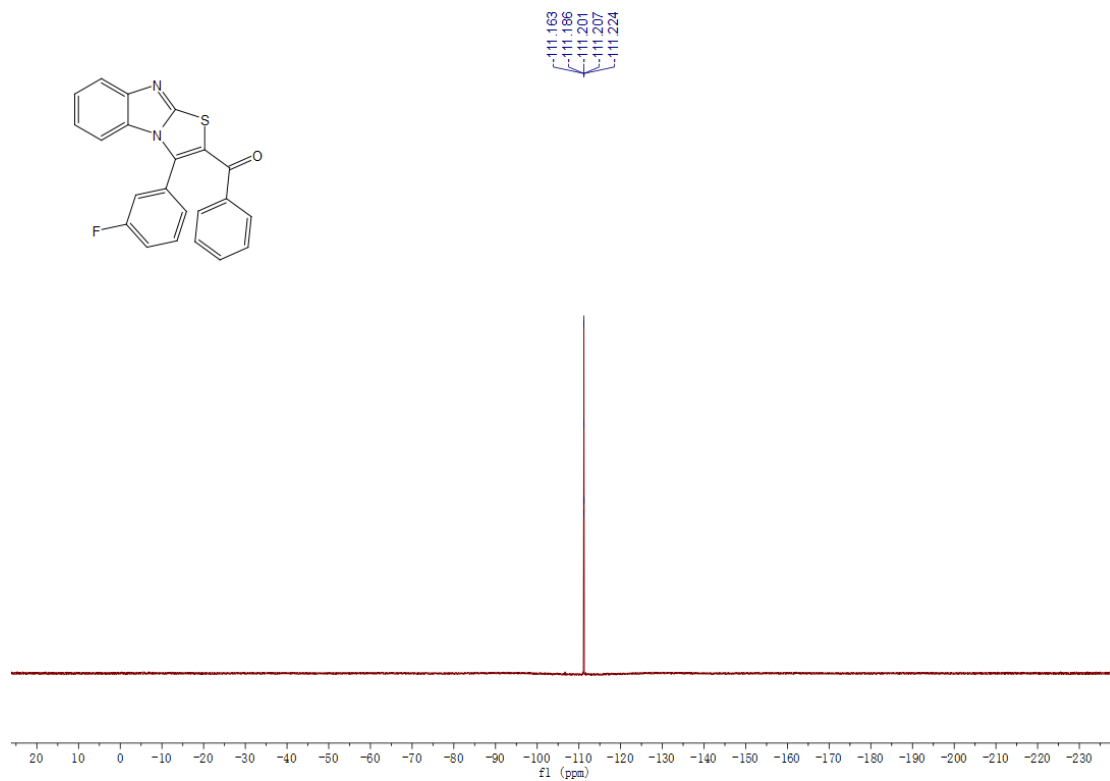

**$^{19}\text{F}$  NMR of compound 3ai in  $\text{CDCl}_3$  (376 MHz)**

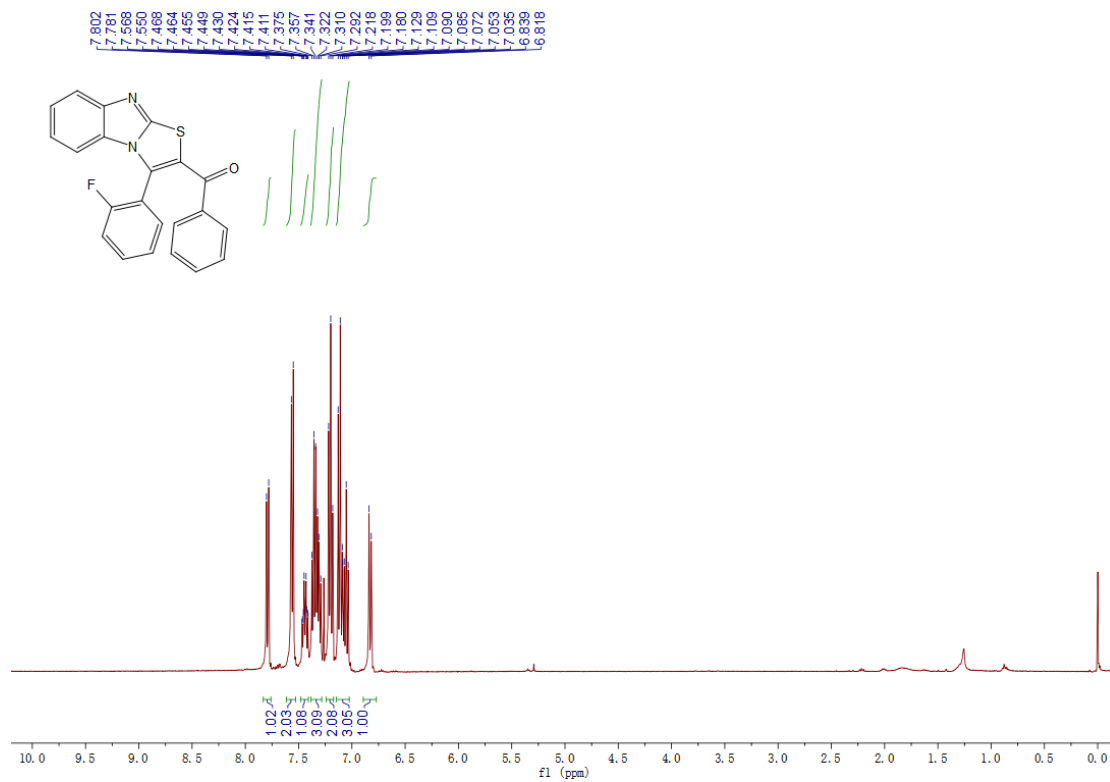

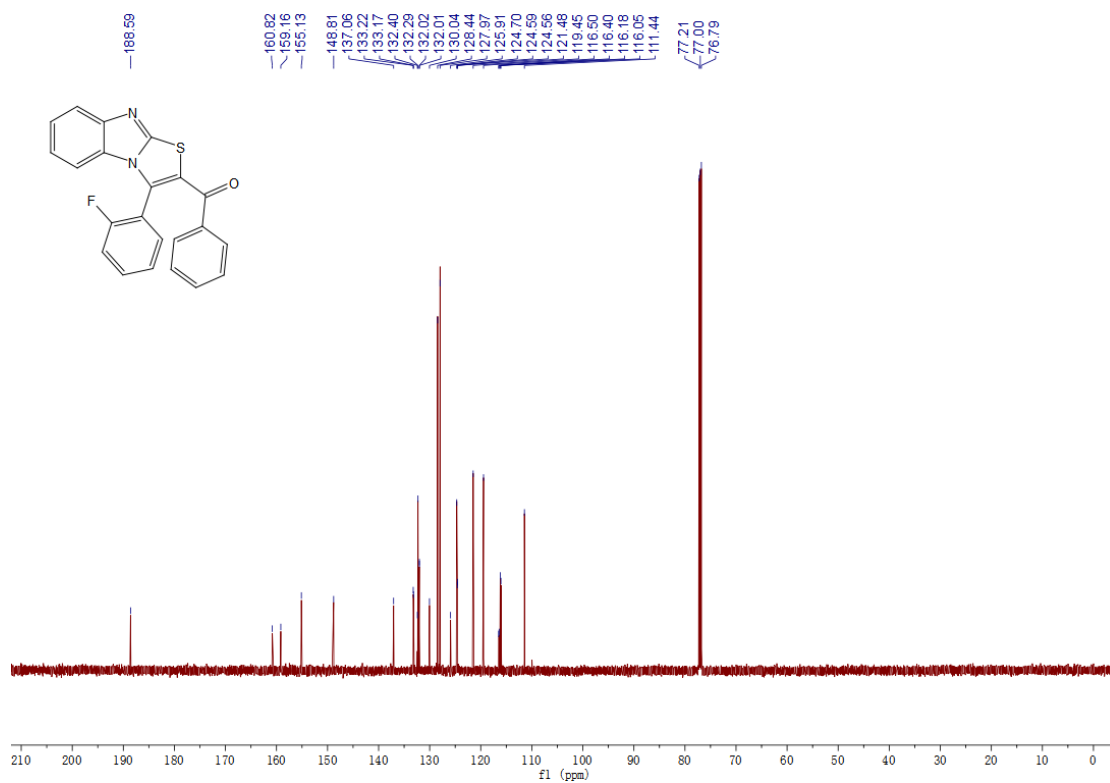

<sup>1</sup>H NMR(400 MHz)、<sup>13</sup>C NMR(150 MHz) of compound 3aj in CDCl<sub>3</sub>

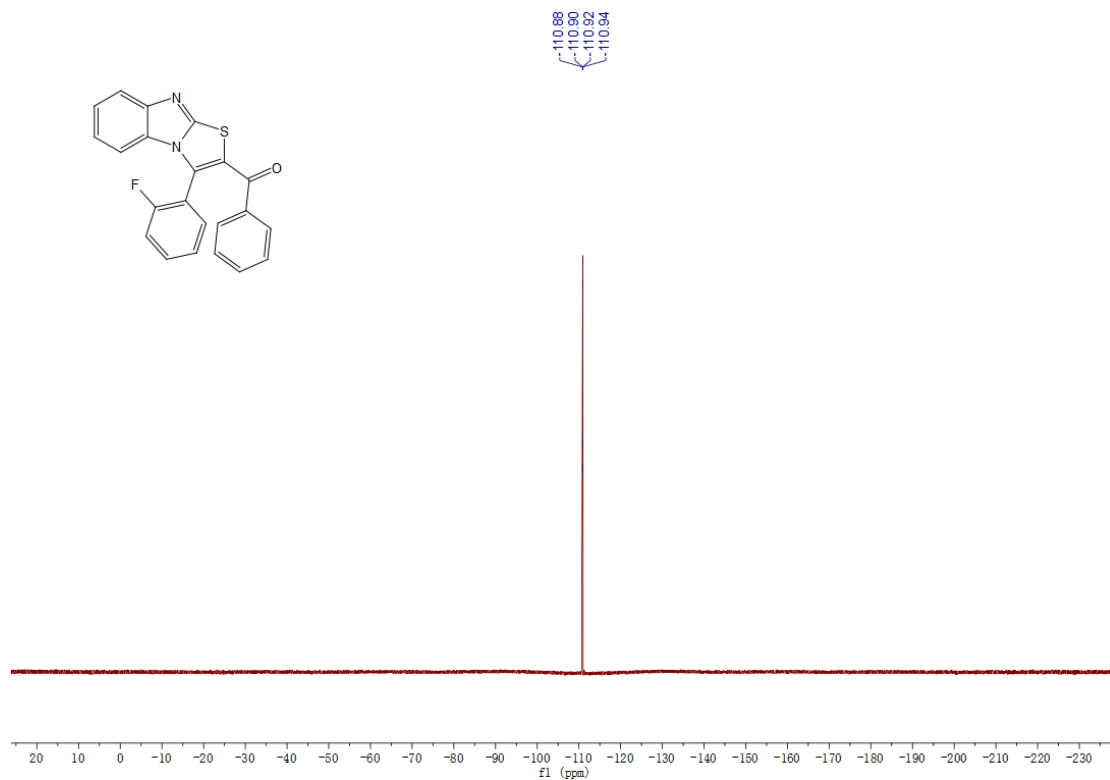

<sup>19</sup>F NMR of compound 3aj in CDCl<sub>3</sub> (376 MHz)

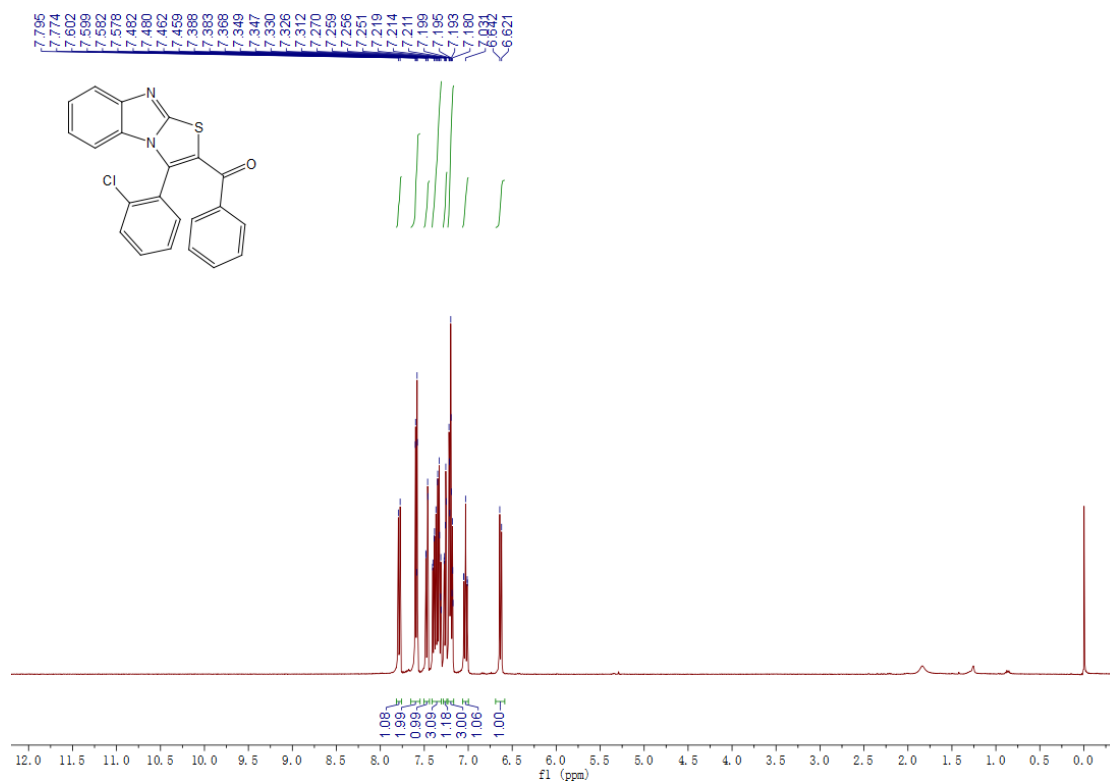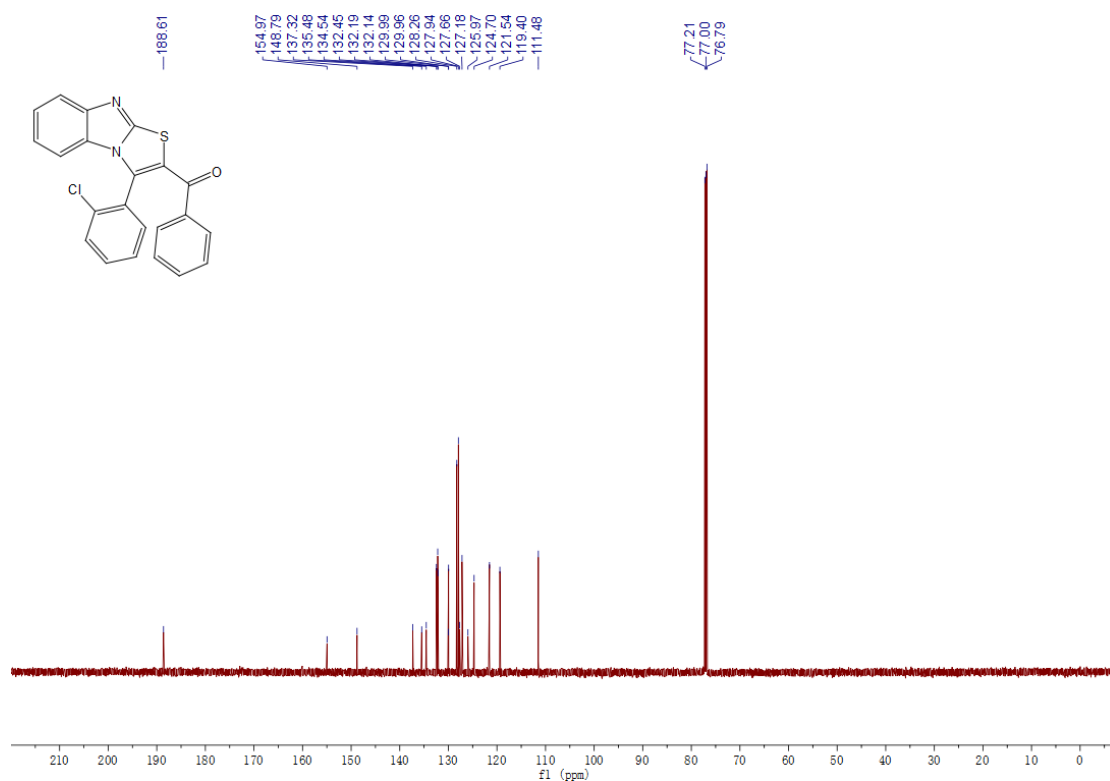

<sup>1</sup>H NMR(400 MHz)、<sup>13</sup>C NMR(150 MHz) of compound 3ak in CDCl<sub>3</sub>

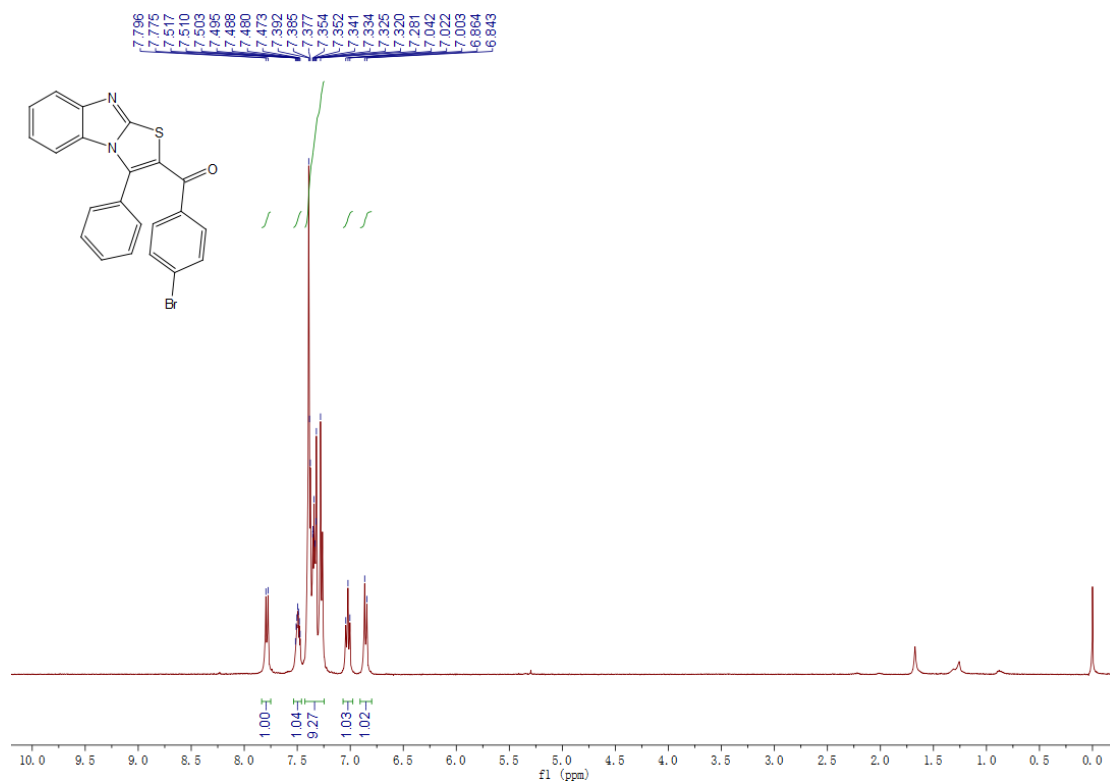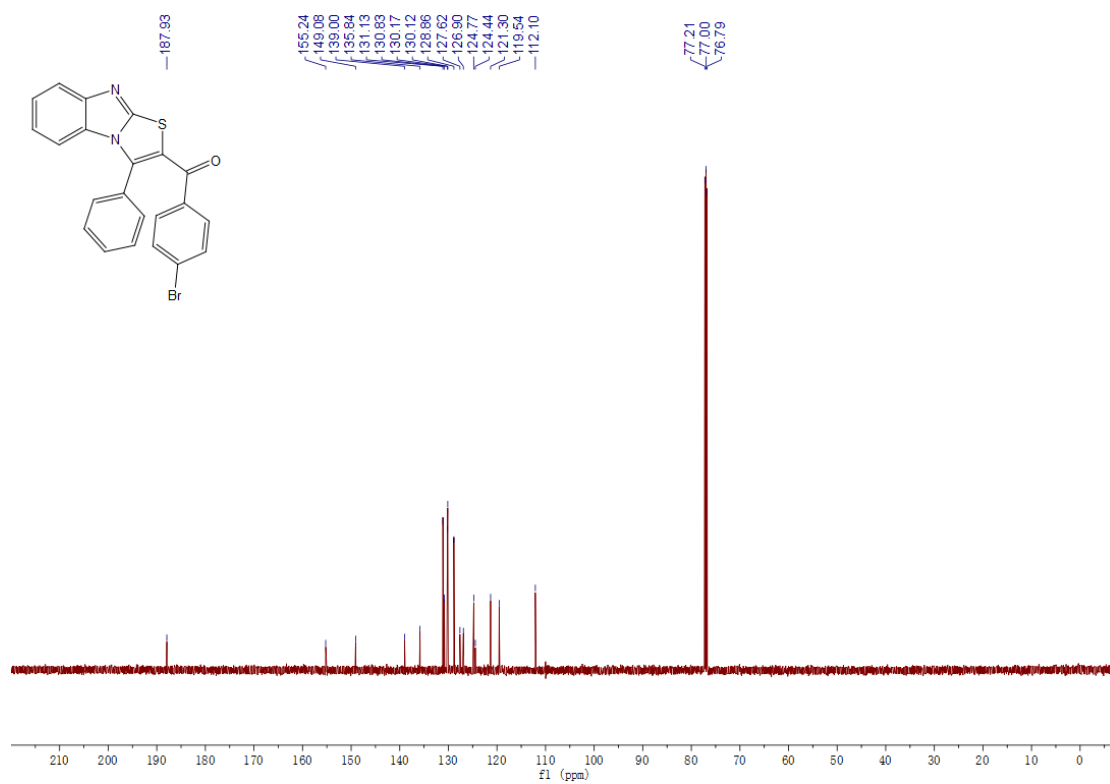

**<sup>1</sup>H NMR(400 MHz), <sup>13</sup>C NMR(150 MHz) of compound 3a in CDCl<sub>3</sub>**

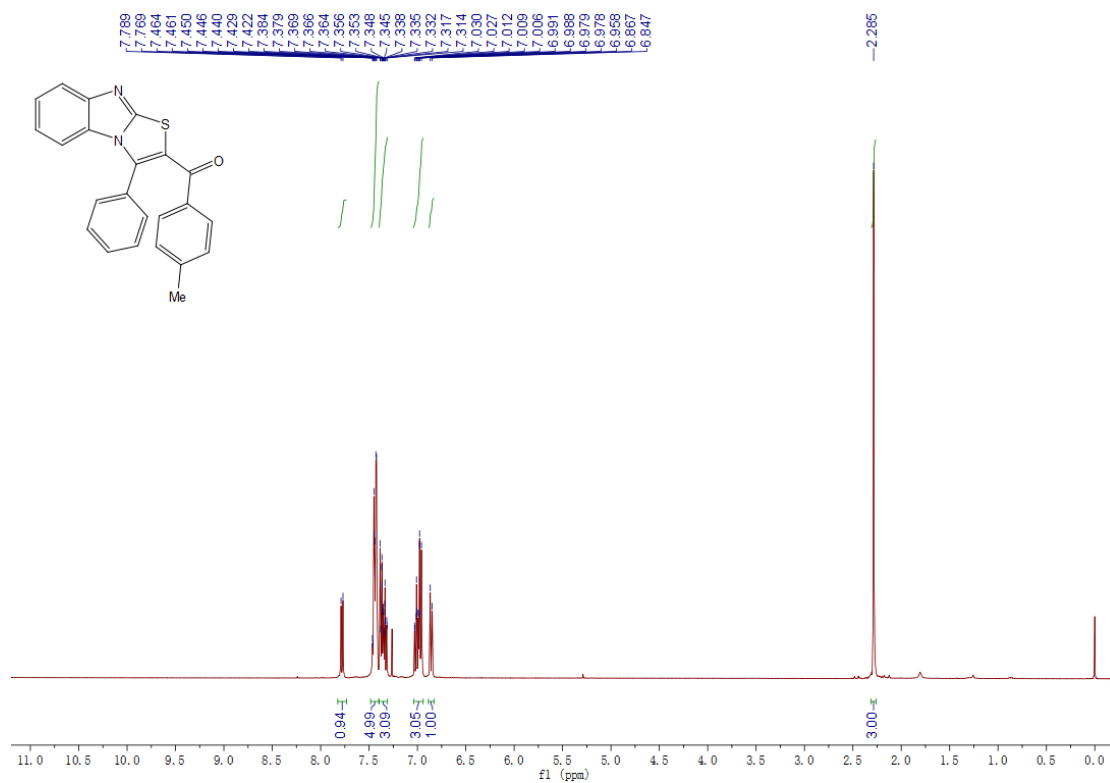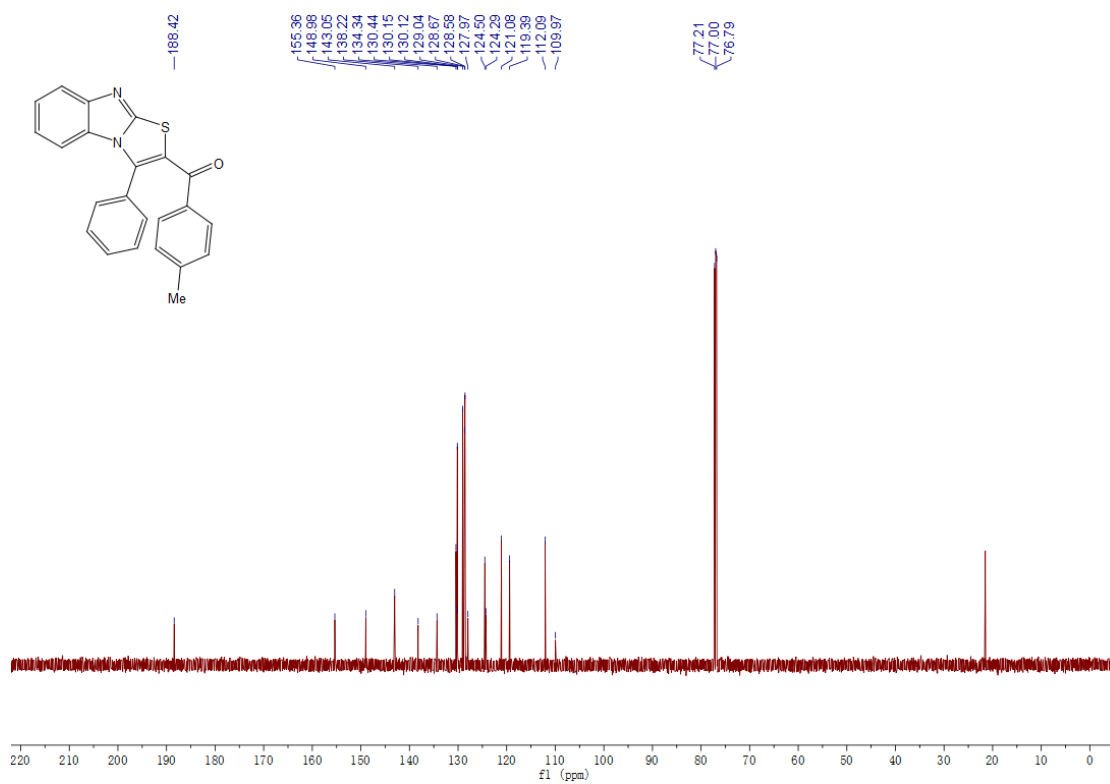

<sup>1</sup>H NMR(400 MHz)、<sup>13</sup>C NMR(150 MHz) of compound 3am in CDCl<sub>3</sub>

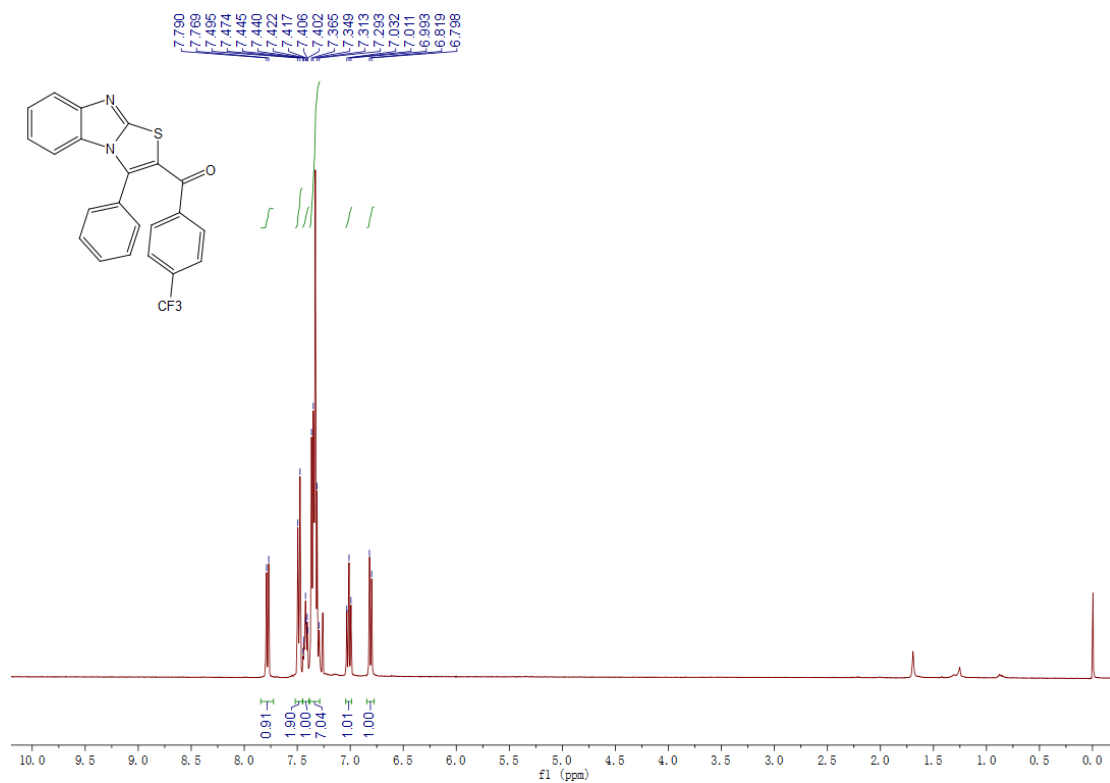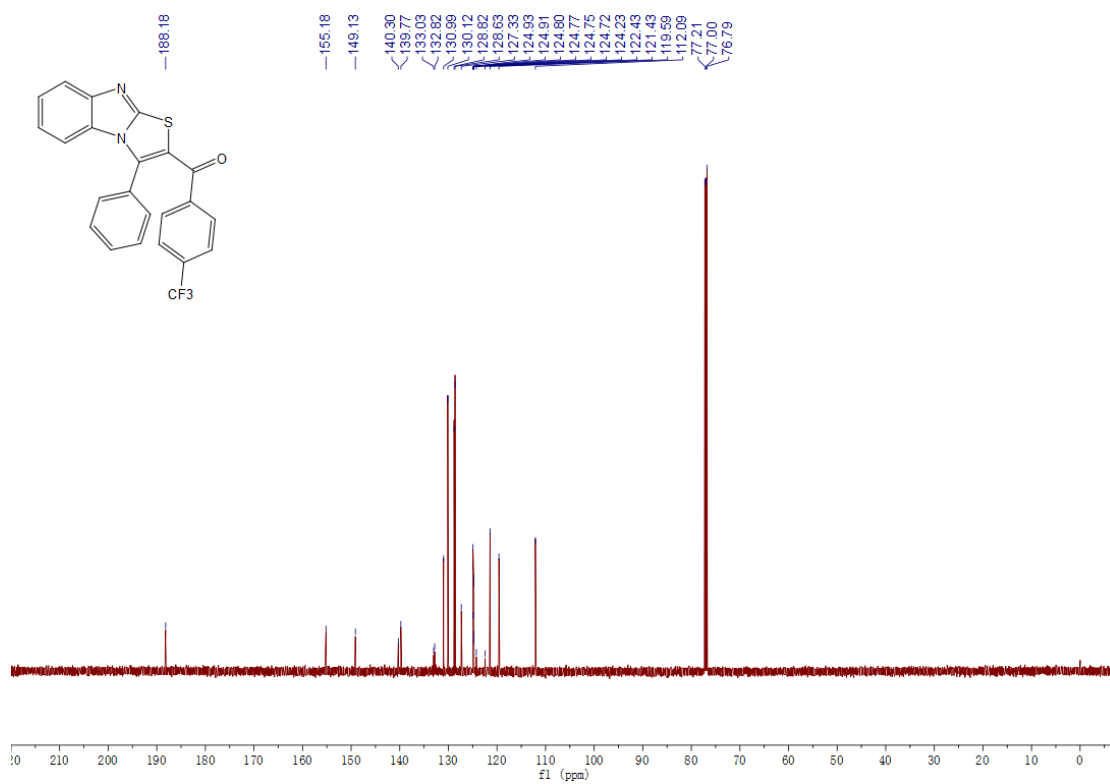

**<sup>1</sup>H NMR(400 MHz)、<sup>13</sup>C NMR(150 MHz) of compound 3an in CDCl<sub>3</sub>**

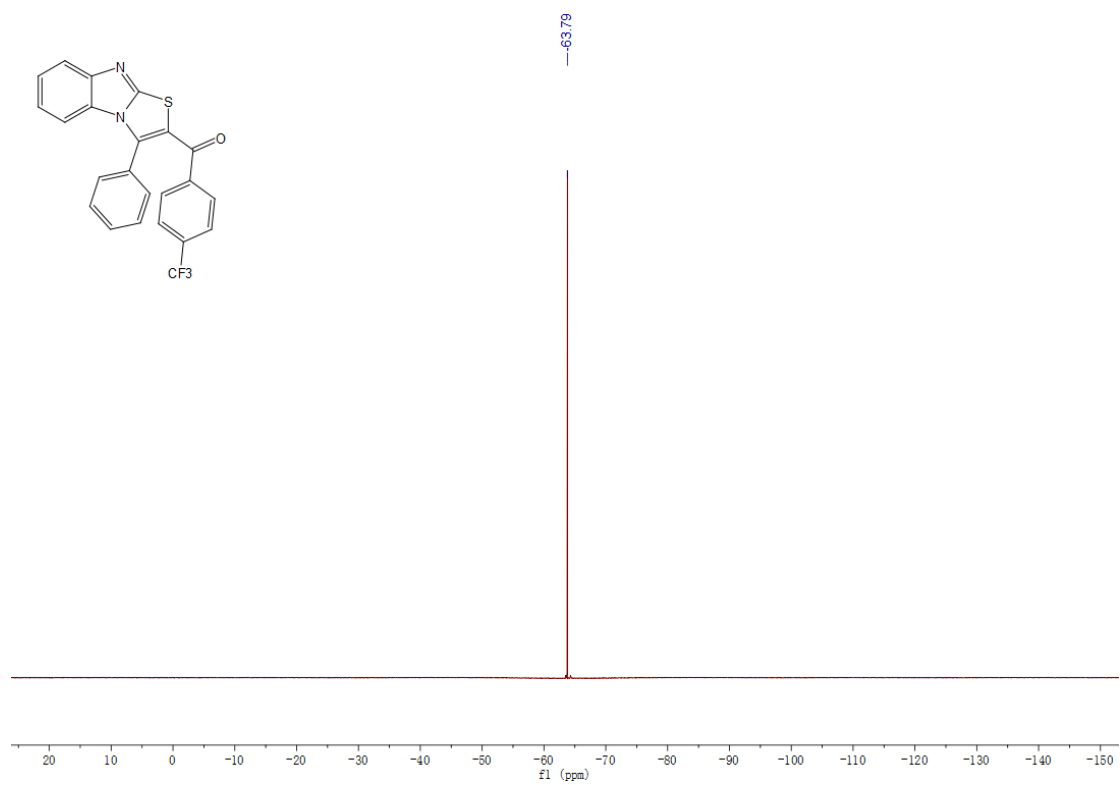

**$^{19}\text{F}$  NMR of compound 3an in  $\text{CDCl}_3$  (376 MHz)**

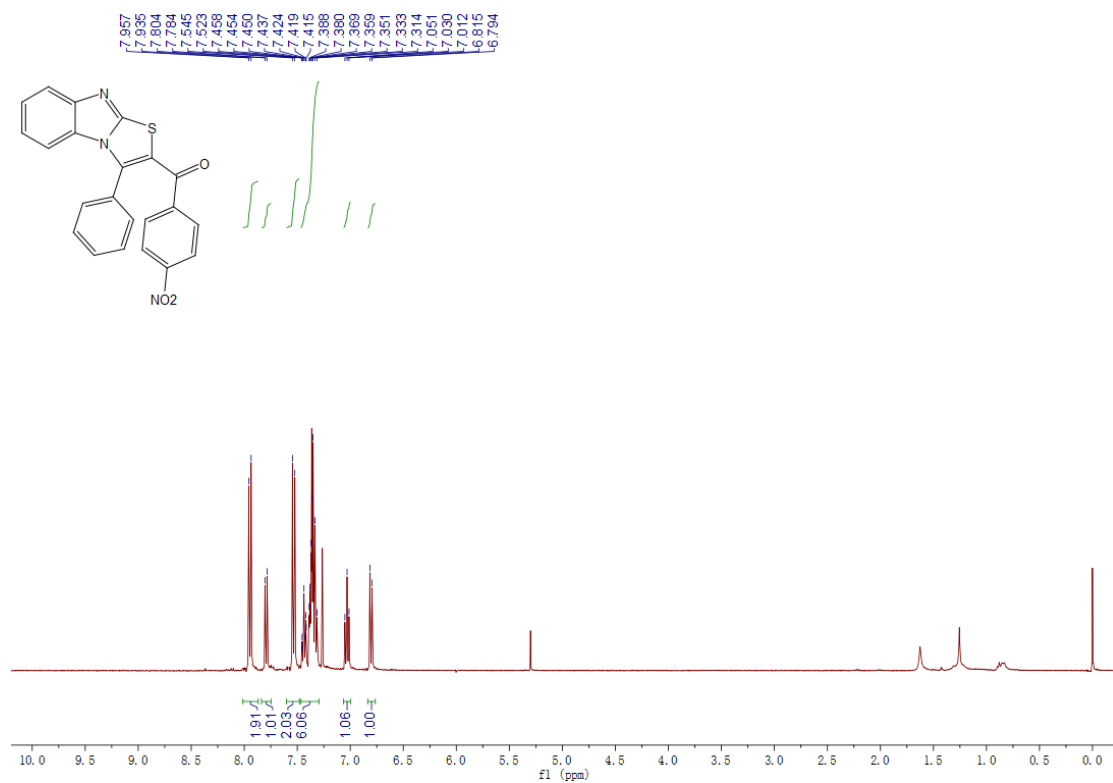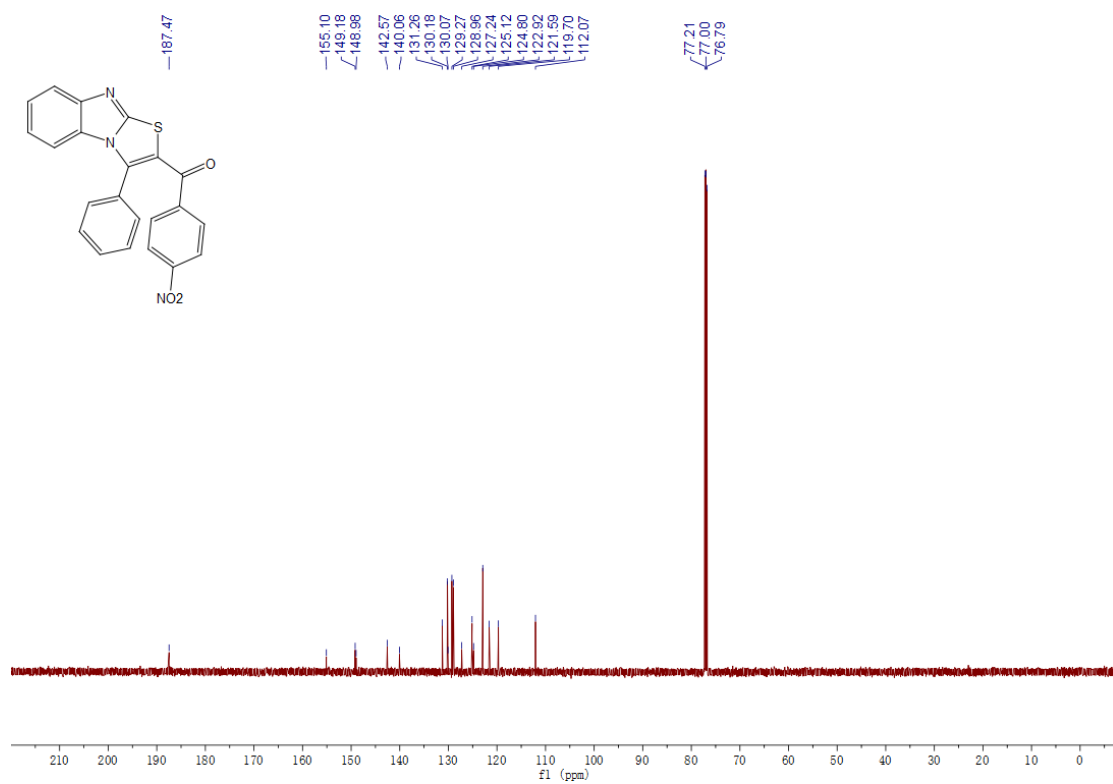

**<sup>1</sup>H NMR(400 MHz)、<sup>13</sup>C NMR(150 MHz) of compound 3ao in CDCl<sub>3</sub>**



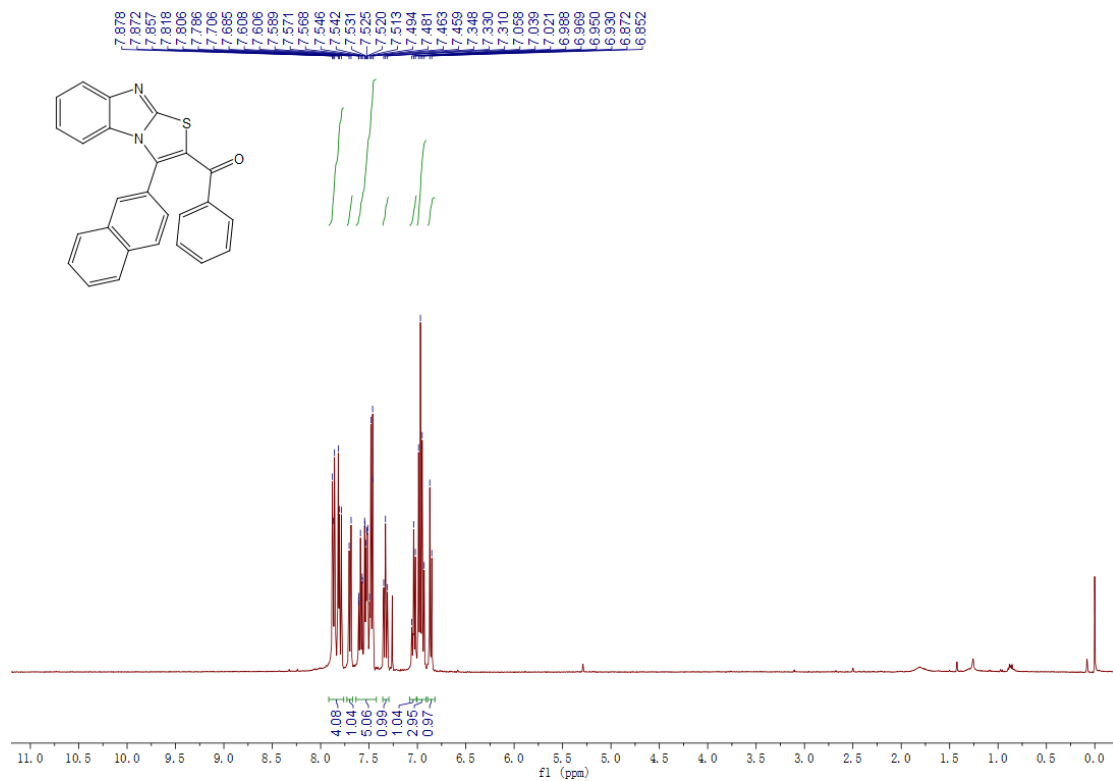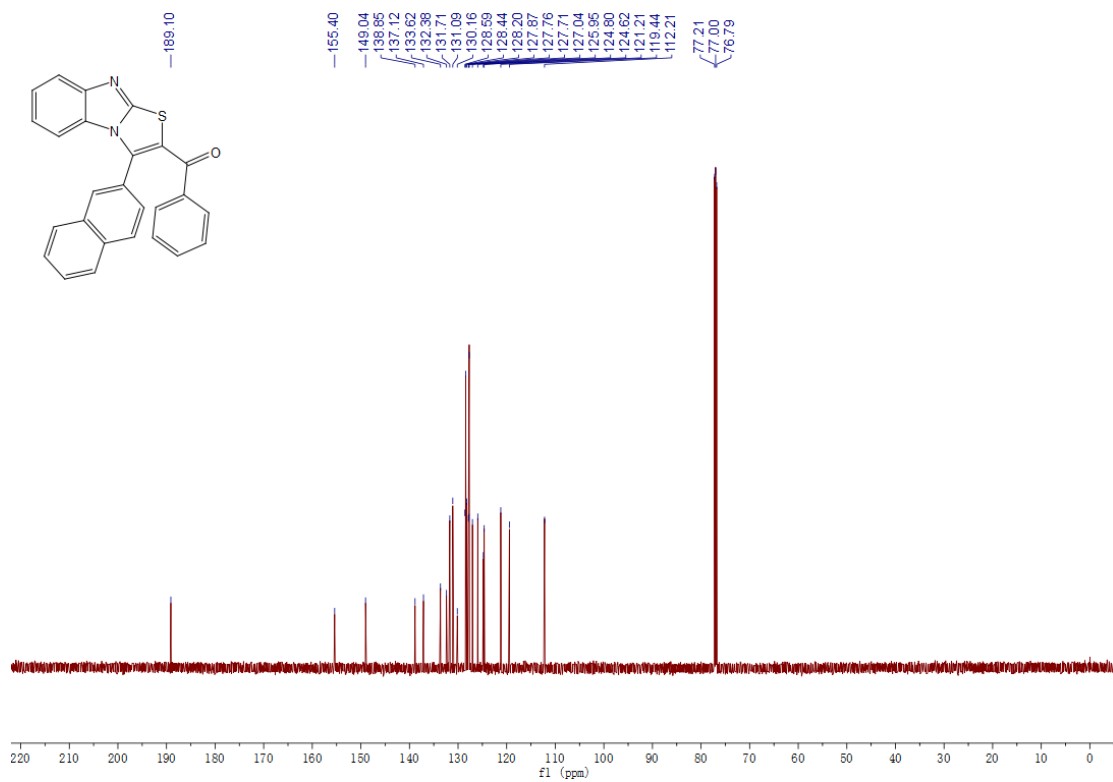

**<sup>1</sup>H NMR(400 MHz)、<sup>13</sup>C NMR(150 MHz) of compound 3ap in CDCl<sub>3</sub>**

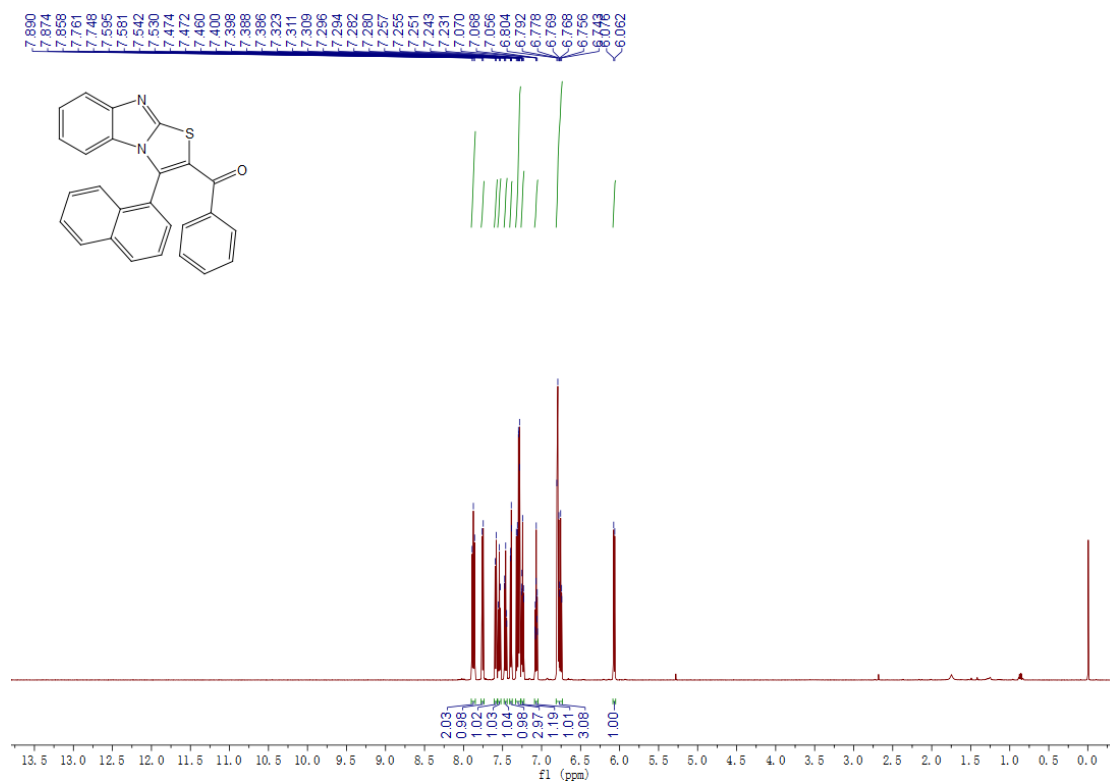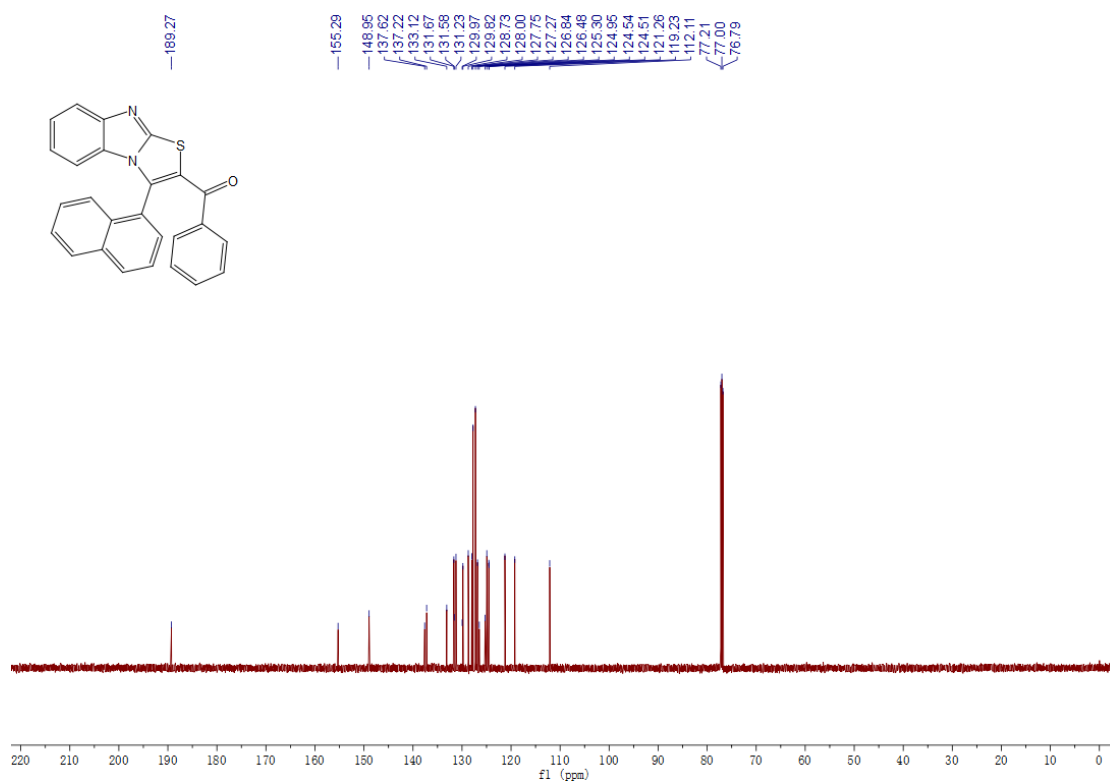

<sup>1</sup>H NMR(600 MHz)、<sup>13</sup>C NMR(150 MHz) of compound 3aq in CDCl<sub>3</sub>

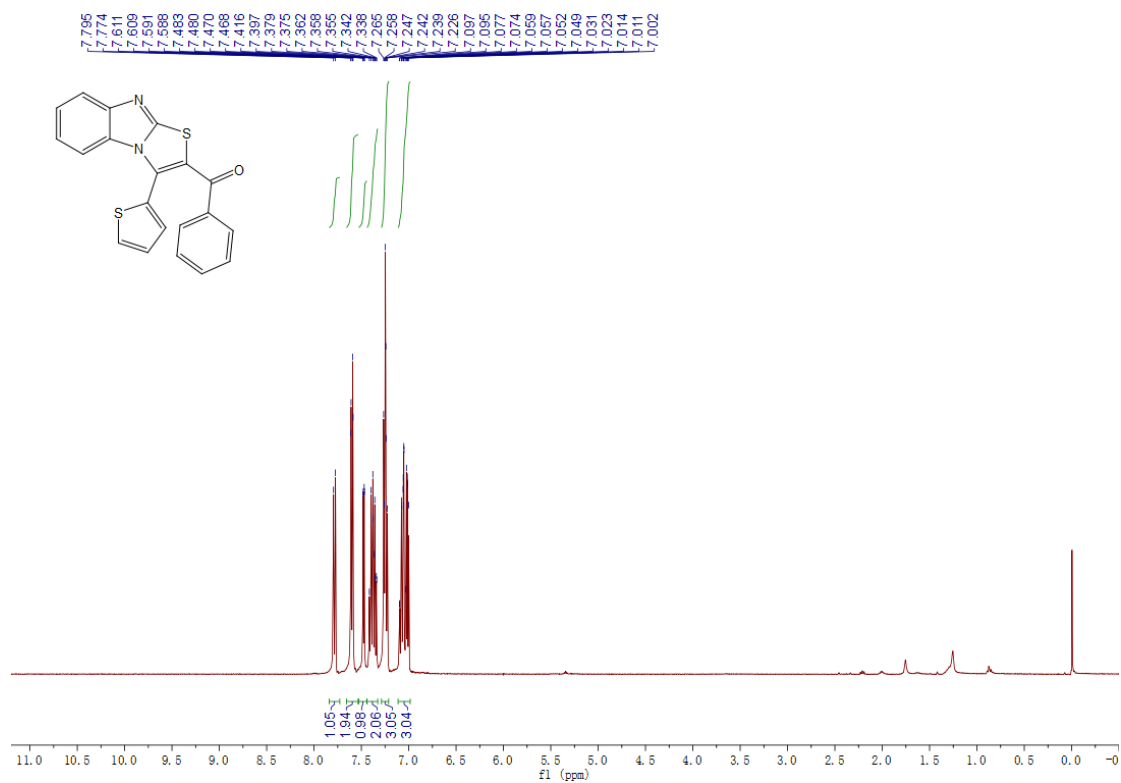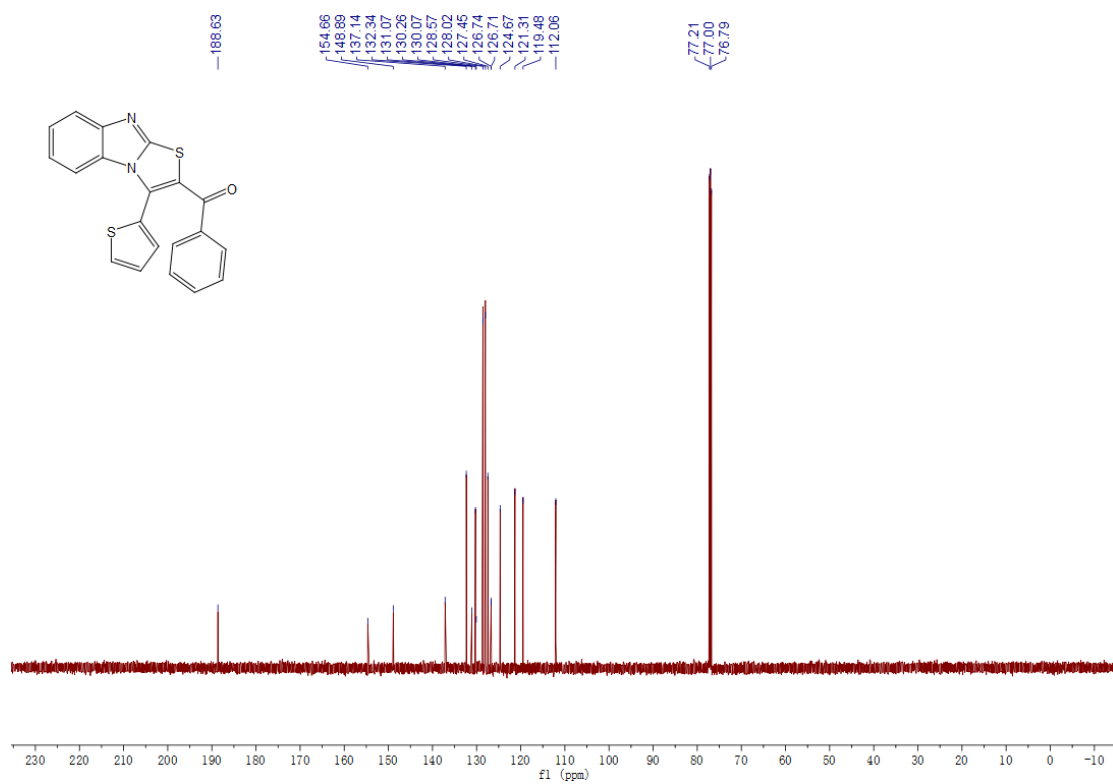

$^1\text{H NMR}$ (400 MHz)、 $^{13}\text{C NMR}$ (150 MHz) of compound 3ar in  $\text{CDCl}_3$

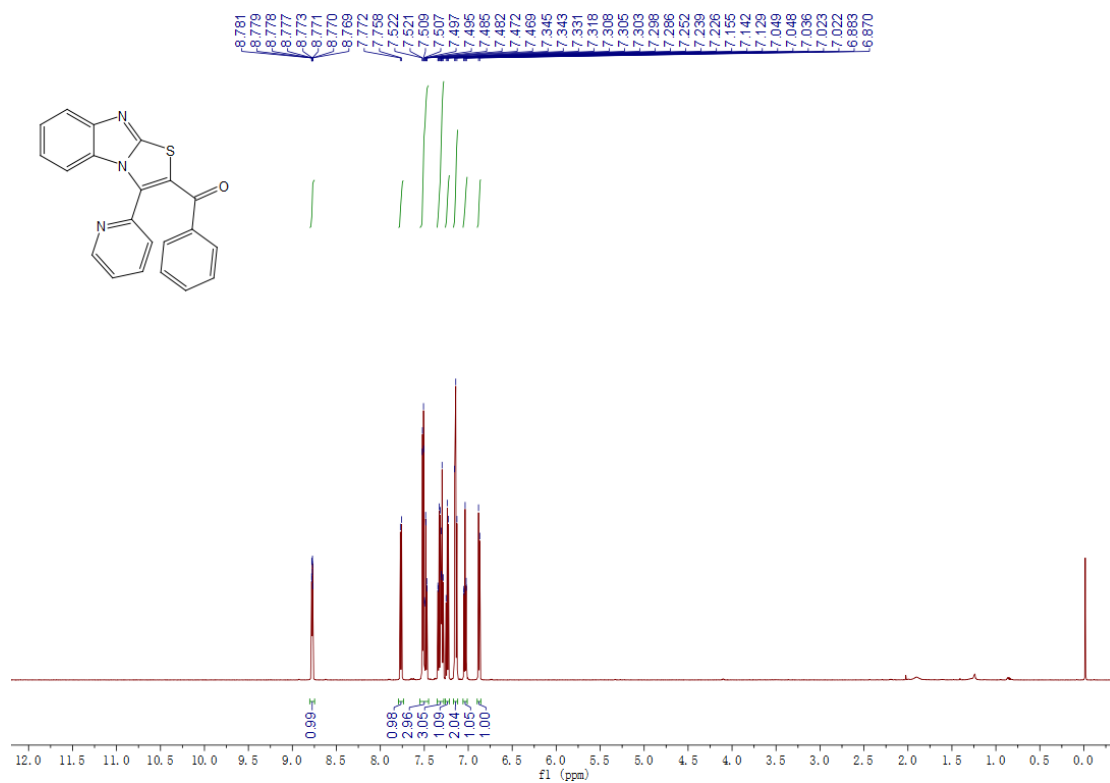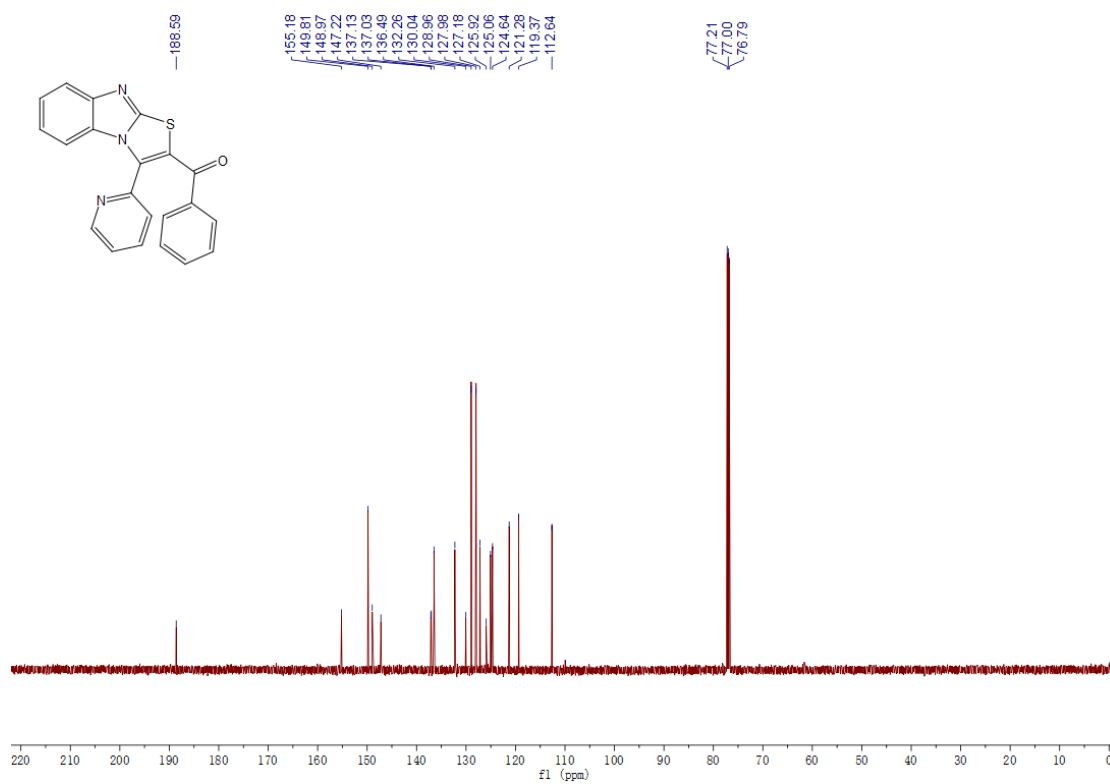

<sup>1</sup>H NMR(600 MHz)、<sup>13</sup>C NMR(150 MHz) of compound 3as in CDCl<sub>3</sub>

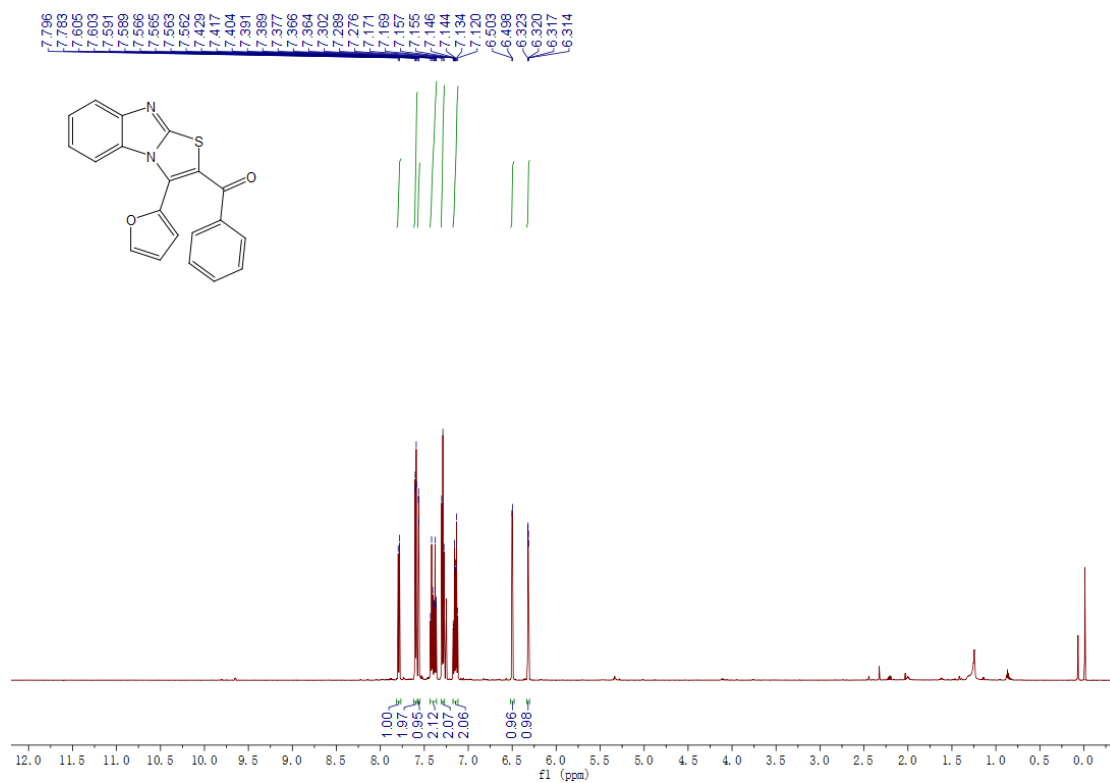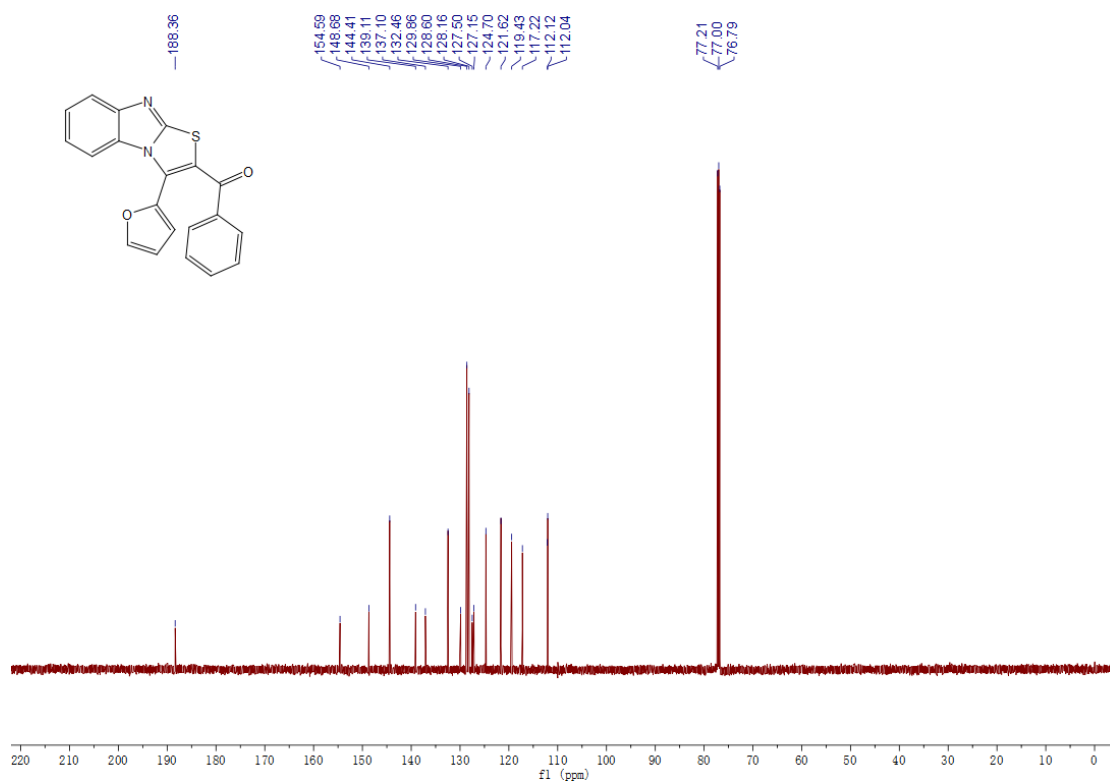

<sup>1</sup>H NMR(600 MHz), <sup>13</sup>C NMR(150 MHz) of compound 3at in CDCl<sub>3</sub>

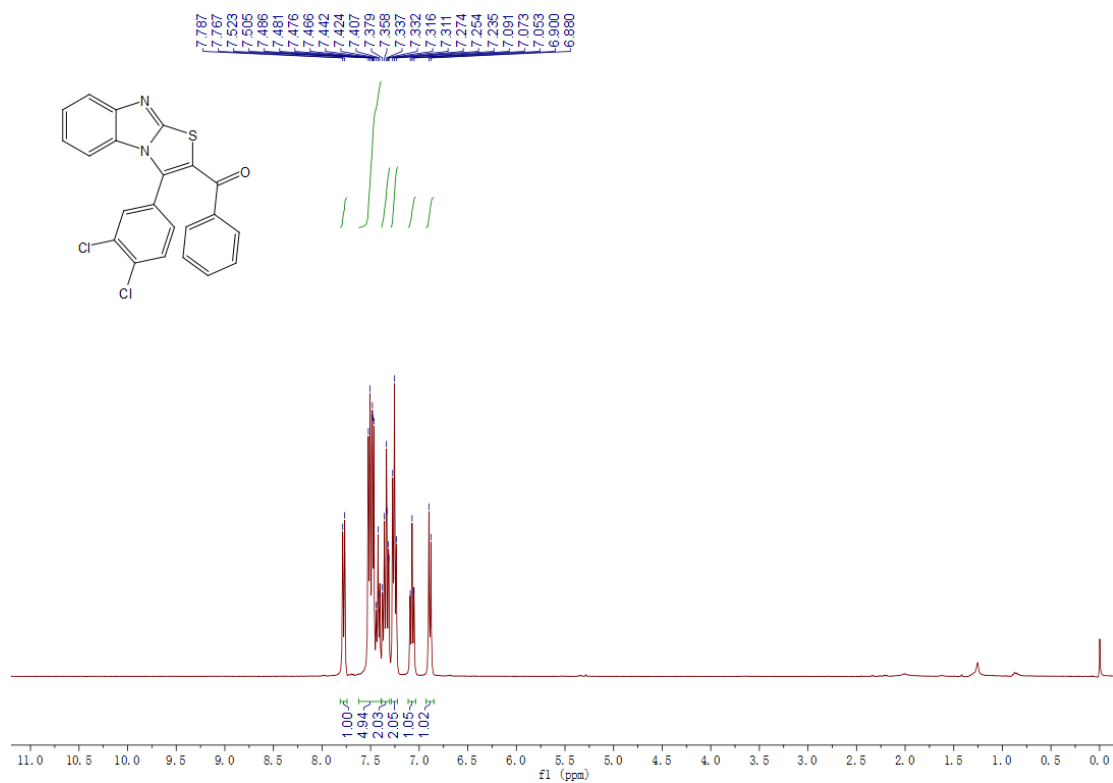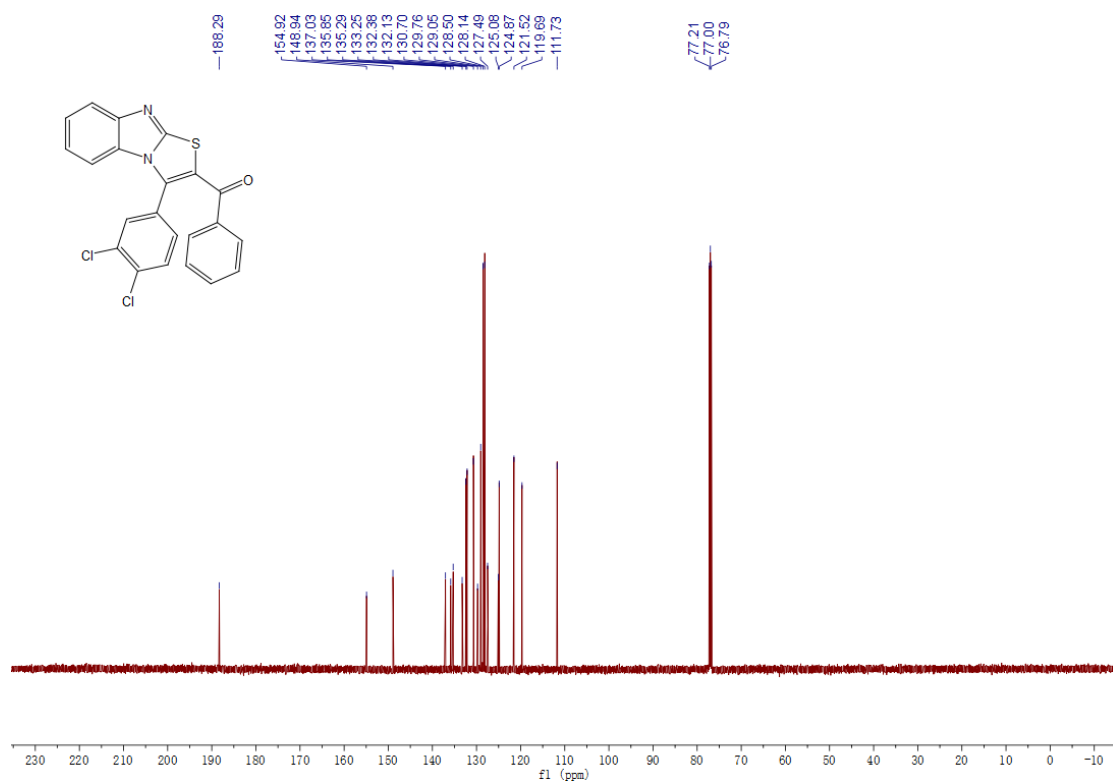

**<sup>1</sup>H NMR(400 MHz)、<sup>13</sup>C NMR(150 MHz) of compound 3au in CDCl<sub>3</sub>**

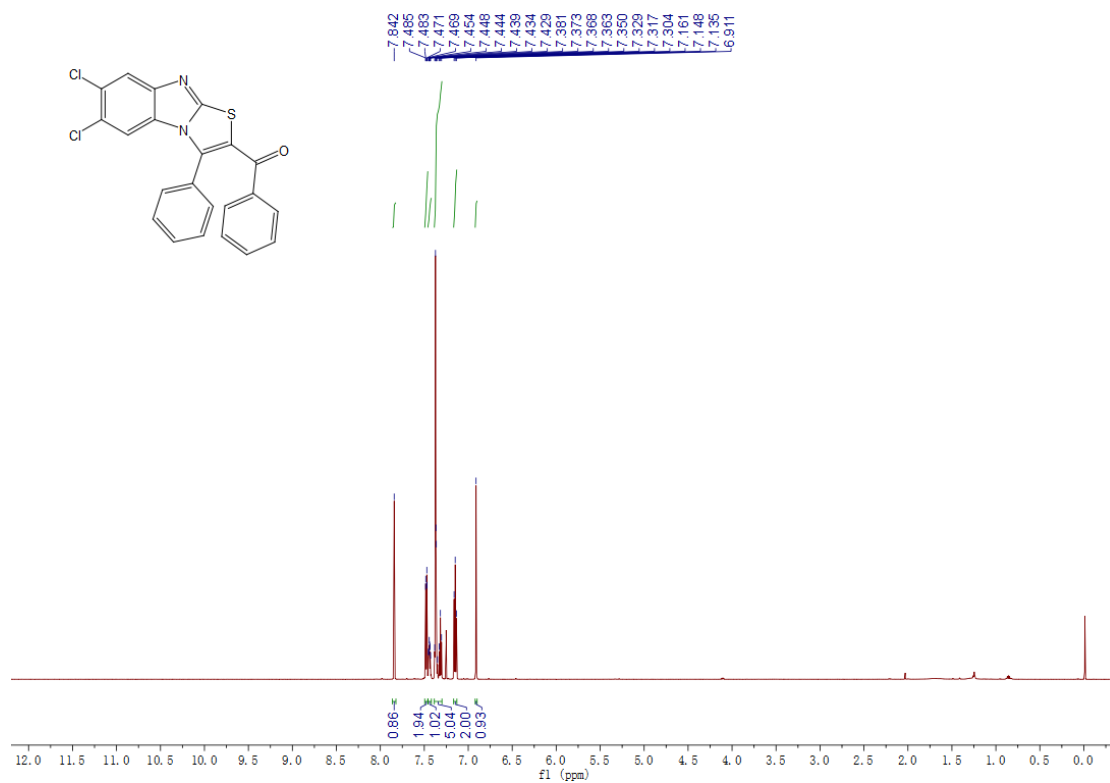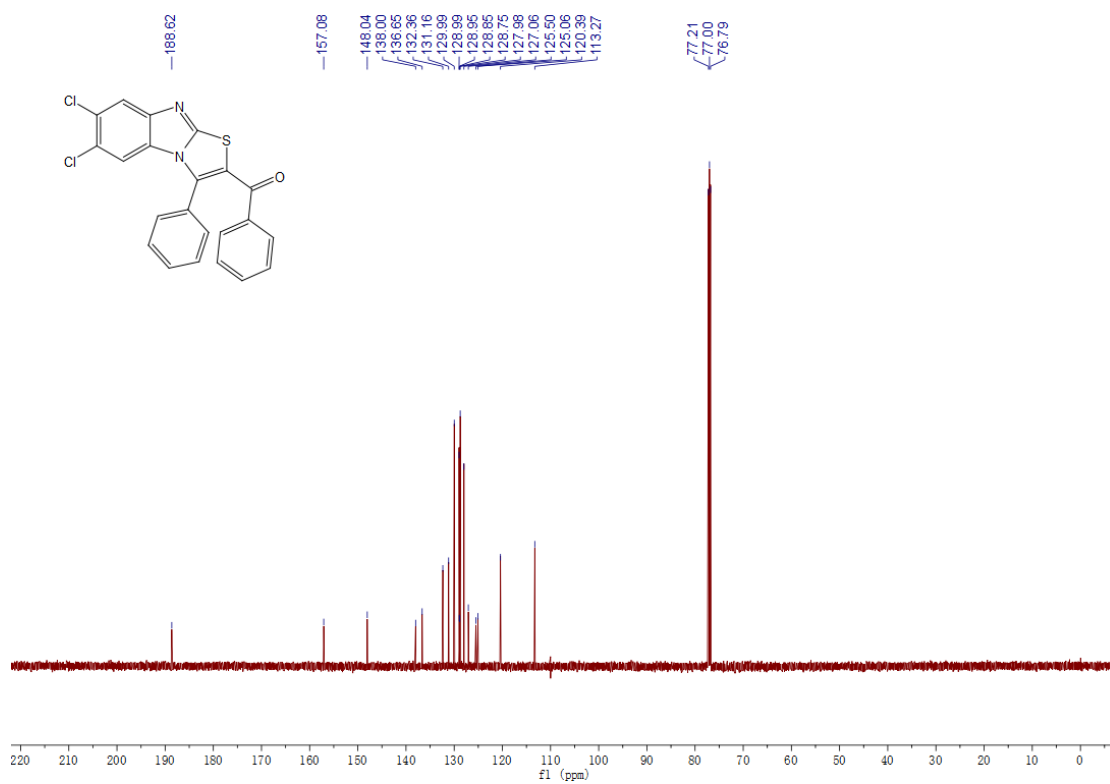

<sup>1</sup>H NMR(600 MHz)、<sup>13</sup>C NMR(150 MHz) of compound 3av in CDCl<sub>3</sub>

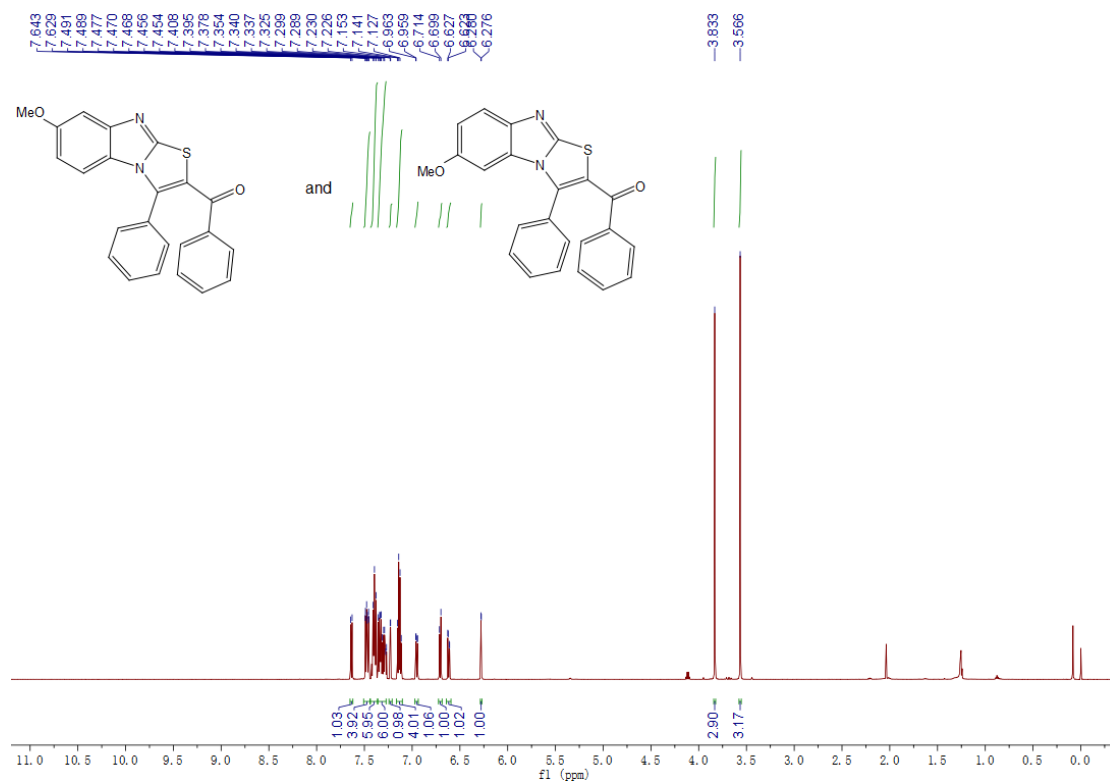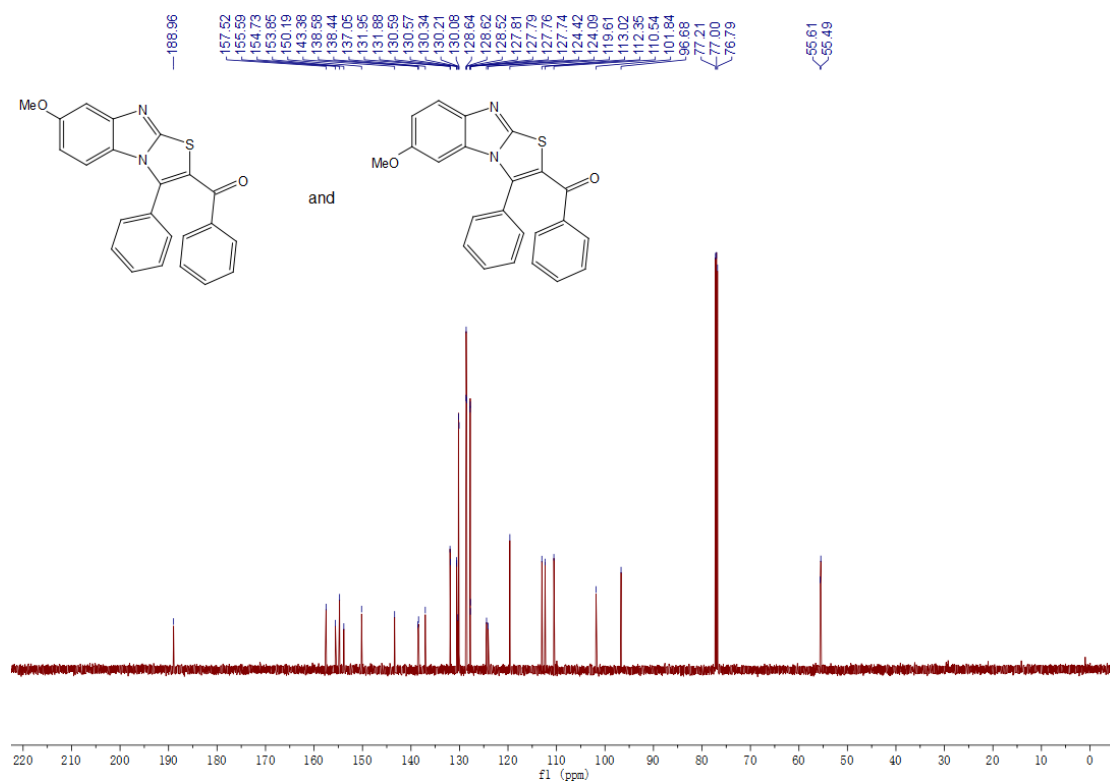

<sup>1</sup>H NMR(600 MHz)、<sup>13</sup>C NMR(150 MHz) of compound 3aw,3aw' in CDCl<sub>3</sub>



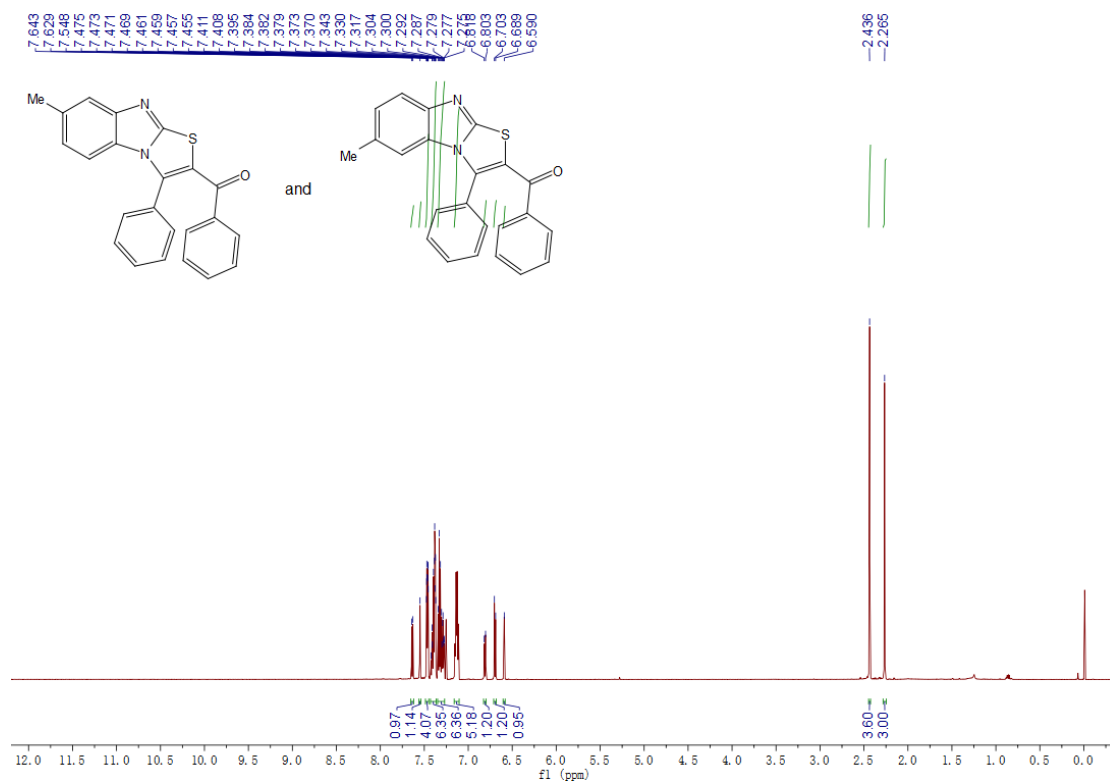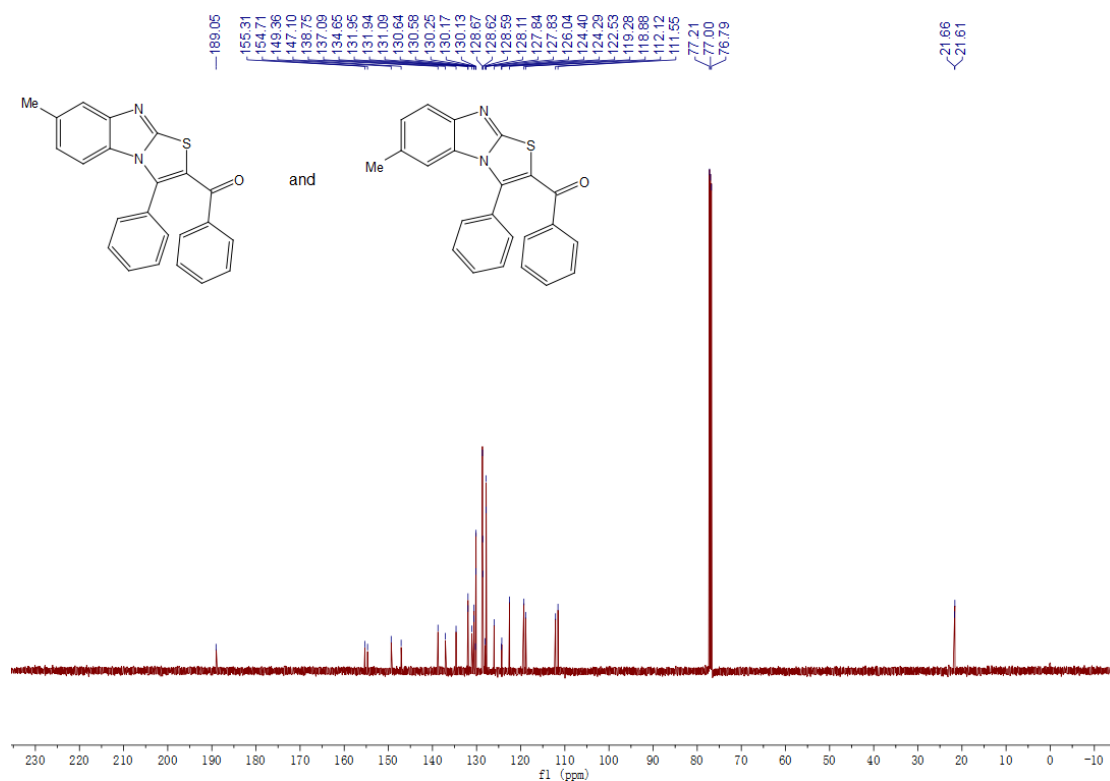

**<sup>1</sup>H NMR(400 MHz)、<sup>13</sup>C NMR(150 MHz) of compound 3ax,3ax' in CDCl<sub>3</sub>**

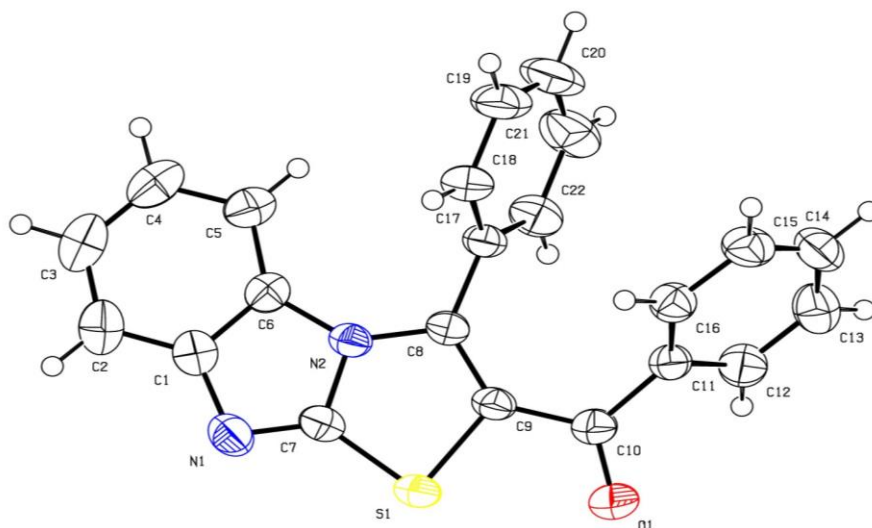

**Figure S4. Single crystal data for product 3aa**

---

|                                |                                            |                  |               |
|--------------------------------|--------------------------------------------|------------------|---------------|
| Bond precision: C-C = 0.0021 Å | Wavelength=0.71073                         |                  |               |
| Cell:                          | a=11.5640 (4)                              | b=8.9788 (4)     | c=17.5497 (7) |
|                                | alpha=90                                   | beta=101.097 (4) | gamma=90      |
| Temperature:                   | 302 K                                      |                  |               |
|                                | Calculated                                 | Reported         |               |
| Volume                         | 1788.13 (13)                               | 1788.12 (13)     |               |
| Space group                    | P 21/n                                     | P 1 21/n 1       |               |
| Hall group                     | -P 2yn                                     | -P 2yn           |               |
| Moiety formula                 | C22 H14 N2 O S                             | C22 H14 N2 O S   |               |
| Sum formula                    | C22 H14 N2 O S                             | C22 H14 N2 O S   |               |
| Mr                             | 354.41                                     | 354.41           |               |
| Dx, g cm <sup>-3</sup>         | 1.316                                      | 1.316            |               |
| Z                              | 4                                          | 4                |               |
| Mu (mm <sup>-1</sup> )         | 0.194                                      | 0.194            |               |
| F000                           | 736.0                                      | 736.0            |               |
| F000'                          | 736.76                                     |                  |               |
| h, k, lmax                     | 16, 12, 25                                 | 16, 12, 22       |               |
| Nref                           | 5644                                       | 4482             |               |
| Tmin, Tmax                     | 0.961, 0.983                               | 0.846, 1.000     |               |
| Tmin'                          | 0.947                                      |                  |               |
| Correction method=             | # Reported T Limits: Tmin=0.846 Tmax=1.000 |                  |               |
| AbsCorr =                      | MULTI-SCAN                                 |                  |               |

Data completeness= 0.794

Theta (max)= 30.899

R(reflections)= 0.0382(3383)

wR2(reflections)= 0.0990(4482)

S = 1.060

Npar= 236

---

The following ALERTS were generated. Each ALERT has the format **test-name\_ALERT\_alert-type\_alert-level**.

Click on the hyperlinks for more details of the test.

---

**Alert level G**

|                   |                                                  |       |      |       |
|-------------------|--------------------------------------------------|-------|------|-------|
| PLAT912_ALERT_4_G | Missing # of FCF Reflections Above STh/L=        | 0.600 | 1058 | Note  |
| PLAT941_ALERT_3_G | Average HKL Measurement Multiplicity .....       |       | 3.0  | Low   |
| PLAT952_ALERT_5_G | Calculated (ThMax) and CIF-Reported Lmax Differ  |       | 3    | Units |
| PLAT958_ALERT_1_G | Calculated (ThMax) and Actual (FCF) Lmax Differ  |       | 3    | Units |
| PLAT978_ALERT_2_G | Number C-C Bonds with Positive Residual Density. |       | 12   | Info  |

- 
- 0 **ALERT level A** = Most likely a serious problem - resolve or explain
  - 0 **ALERT level B** = A potentially serious problem, consider carefully
  - 0 **ALERT level C** = Check. Ensure it is not caused by an omission or oversight
  - 5 **ALERT level G** = General information/check it is not something unexpected

- 1 ALERT type 1 CIF construction/syntax error, inconsistent or missing data
  - 1 ALERT type 2 Indicator that the structure model may be wrong or deficient
  - 1 ALERT type 3 Indicator that the structure quality may be low
  - 1 ALERT type 4 Improvement, methodology, query or suggestion
  - 1 ALERT type 5 Informative message, check
- 
-

## References:

1. J. Zhang, M. Y. She, L. Liu, X. K. Feng, Y. Li, H. Liu, T. T. Zheng, X. Leng, P. Liu, S. Y. Zhang, J. L. Li, *Org. Lett.* **2021**, 23, 8396-8401.
